1 Cryo-EM structures of mitochondrial respiratory complex I from  
2 *Drosophila melanogaster*

3

4 Ahmed-Noor A. Agip<sup>†</sup>, Injae Chung<sup>†</sup>, Alvaro Sanchez-Martinez<sup>†</sup>, Alexander J.  
5 Whitworth\* & Judy Hirst\*

6

7 The Medical Research Council Mitochondrial Biology Unit, University of Cambridge, The Keith  
8 Peters Building, Cambridge Biomedical Campus, Hills Road, Cambridge CB2 0XY, UK

9 <sup>†</sup>Joint contributions

10 \*Authors for correspondence

11

12 Address correspondence to:

13 A.J.W. ([a.whitworth@mrc-mbu.cam.ac.uk](mailto:a.whitworth@mrc-mbu.cam.ac.uk)) or J.H. ([jh@mrc-mbu.cam.ac.uk](mailto:jh@mrc-mbu.cam.ac.uk))

14 The Medical Research Council Mitochondrial Biology Unit, University of Cambridge, The Keith  
15 Peters Building, Cambridge Biomedical Campus, Hills Road, Cambridge CB2 0XY, UK

## 16 Abstract

17

18 Respiratory complex I powers ATP synthesis by oxidative phosphorylation, exploiting the  
19 energy from NADH oxidation by ubiquinone to drive protons across an energy-transducing  
20 membrane. *Drosophila melanogaster* is a candidate model organism for complex I due to its  
21 high evolutionary conservation with the mammalian enzyme, well-developed genetic toolkit,  
22 and complex physiology for studies in specific cell types and tissues. Here, we isolate complex  
23 I from *Drosophila* and determine its structure, revealing a 43-subunit assembly with high  
24 structural homology to its 45-subunit mammalian counterpart, including a hitherto unknown  
25 homologue to subunit NDUFA3. The major conformational state of the *Drosophila* enzyme is  
26 the mammalian-type ‘ready-to-go’ active resting state, with a fully ordered and enclosed  
27 ubiquinone-binding site, but a subtly altered global conformation related to changes in subunit  
28 ND6. The mammalian-type ‘deactive’ pronounced resting state is not observed: in two minor  
29 states the ubiquinone-binding site is unchanged, but a deactive-type  $\pi$ -bulge is present in  
30 ND6-TMH3. Our detailed structural knowledge of *Drosophila* complex I provides a foundation  
31 for new approaches to disentangle mechanisms of complex I catalysis and regulation in  
32 bioenergetics and physiology.

## 33 Introduction

34

35 Mitochondrial complex I (NADH:ubiquinone oxidoreductase) is a crucial enzyme in cellular  
36 metabolism, central to NAD<sup>+</sup> homeostasis, respiration and oxidative phosphorylation, and a  
37 key contributor to the production of cellular reactive oxygen species (ROS) (Hirst, 2013; Parey  
38 et al., 2020). By catalyzing NADH oxidation in the mitochondrial matrix coupled to ubiquinone  
39 reduction in the inner membrane, it regenerates the oxidized NAD<sup>+</sup> pool to sustain crucial  
40 metabolic processes including the tricarboxylic acid cycle and  $\beta$ -oxidation, and provides  
41 reducing equivalents to the downstream complexes of the electron transport chain. The  
42 energy from NADH:ubiquinone oxidoreduction is harnessed to transport four protons across  
43 the inner membrane (Jones et al., 2017), supporting the proton motive force ( $\Delta p$ ) that drives  
44 ATP synthesis and transport processes. These central roles of complex I in both metabolism  
45 and oxidative stress make complex I dysfunctions, induced by genetic, pharmacological and  
46 environmental factors, some of the most frequent primary causes of mitochondrial diseases,  
47 as well as a contributor to many socially and economically important diseases common in  
48 ageing populations (Fassone and Rahman, 2012; Fiedorczuk and Sazanov, 2018; Padavannil  
49 et al., 2022). For example, ROS production by complex I operating in reverse, during ‘reverse  
50 electron transfer’ (RET,  $\Delta p$ -driven ubiquinol:NAD<sup>+</sup> oxidoreduction) (Pryde and Hirst, 2011), is  
51 a major contributor to the tissue damage that occurs in strokes and heart attacks, during  
52 ischemia-reperfusion (IR) injury (Chouchani et al., 2016, 2014; Dröse et al., 2016; Yin et al.,  
53 2021).

54

55 Mammalian complex I is a 1 MDa asymmetric assembly of 45 subunits, encoded on both the  
56 nuclear and mitochondrial genomes (Hirst, 2013; Hirst et al., 2003; Zhu et al., 2016). Fourteen  
57 of them (seven nuclear and seven mitochondrial) are the core subunits conserved in all  
58 complex I homologues that are essential for catalysis, whereas the other 31 subunits are  
59 supernumerary subunits that are involved in enzyme assembly, stability and regulation, or that  
60 have independent roles within the cell (Hirst et al., 2003; Padavannil et al., 2022; Zhu et al.,  
61 2016). Bioinformatic analyses have indicated how the cohort of supernumerary subunits has  
62 been augmented gradually throughout the evolution of the eukaryotic complex (Gabaldón et  
63 al., 2005), and an increasing range of structural analyses of different species of complex I now  
64 illustrates the diversity of the supernumerary subunit cohorts that have developed in different  
65 eukaryotic lineages (Klusck et al., 2021; Parey et al., 2021; Soufari et al., 2020; Zhou et al.,  
66 2022).

67

68 For mammalian complex I, the form of the enzyme most relevant in medicine, single-particle  
69 electron cryomicroscopy (cryo-EM) has yielded detailed structural information on multiple  
70 different states of the complex (Chung et al., 2022a; Kampjut and Sazanov, 2022; Parey et  
71 al., 2020). However, detailed structure-function studies are limited for the mammalian enzyme  
72 due to substantial challenges in creating and studying genetic variants in representative  
73 mammalian model systems, such as mouse. Whereas simpler model systems, such as  $\alpha$ -  
74 proteobacteria or yeast species (Jarman et al., 2021; Kravchuk et al., 2022; Parey et al., 2019),  
75 allow far greater opportunities for genetic studies, the protein compositions of their complex I  
76 vary substantially from the mammalian enzyme, they fail to recapitulate key characteristics  
77 and behavior of the mammalian complex such as the ‘active/deactive transition’ (Babot et al.,  
78 2014; Kotlyar and Vinogradov, 1990; Maklashina et al., 2003; Vinogradov, 1998), and the  
79 physiological environments in which the variant complexes can be studied are very restricted.  
80 Most relevant here, the active and deactive states of mammalian complex I are two  
81 biochemically and structurally characterised resting states of the complex (Agip et al., 2018;  
82 Blaza et al., 2018; Chung et al., 2022b, 2022a; Zhu et al., 2016): the ‘active’ ready-to-go  
83 resting state, and the ‘deactive’ pronounced resting state. They differ both in their global  
84 conformations and in the status of local structural features. In particular, the ubiquinone-  
85 binding site in the active state is fully enclosed and sealed, whereas in the deactive state  
86 disorder in the enclosing loops opens the site to the matrix (Agip et al., 2018; Blaza et al.,  
87 2018; Chung et al., 2022b, 2022a; Zhu et al., 2016). The active and deactive resting states  
88 have also been referred to as the ‘closed’ and ‘open’ states of the mammalian enzyme on the  
89 basis of changes in the apparent angle between their membrane and hydrophilic domains  
90 (Kampjut and Sazanov, 2020). Finally, we note that there is currently substantial controversy  
91 about the biochemical and physiological relevance of the open states of the mammalian  
92 complex (Chung et al., 2022a), which have recently been proposed to include, not only the  
93 deactive resting state, but also on-cycle catalytic intermediates (Kampjut and Sazanov, 2020;  
94 Kravchuk et al., 2022).

95

96 The fruit fly, *Drosophila melanogaster*, is a powerful genetically tractable model organism for  
97 metazoa. *Drosophila* encodes a complex I with a composition that closely resembles that of  
98 the mammalian complex (Gabaldón et al., 2005; Rhooms et al., 2020), with clear homologues  
99 to 42 of the 44 mammalian subunits identified. Therefore, in addition to providing an additional  
100 model system for studying the mechanism of complex I catalysis (also accessible in simpler  
101 unicellular models), variants in *Drosophila* complex I can be studied for their effects on  
102 regulation and assembly (Cho et al., 2012; Garcia et al., 2017; Murari et al., 2020).  
103 Furthermore, *Drosophila* can potentially be exploited to investigate features of complex I  
104 function that are observed for mammalian complex I, but not universal features of the enzyme

105 in simpler organisms, such as the active/deactive transition, RET, and the involvement of  
106 complex I in supercomplexes (Garcia et al., 2017; Scialò et al., 2016; Shimada et al., 2018).  
107 For instance, studies in *Drosophila* have proposed that RET-ROS increase lifespan (Scialò et  
108 al., 2016) and *Drosophila* are remarkably resistant to hypoxic or anoxic exposure (Haddad,  
109 2006; Zhou and Haddad, 2013), which might provide insights into pathological mechanisms  
110 of RET-mediated IR injury. Furthermore, with substantial tissues, such as indirect flight  
111 muscles, highly enriched with mitochondria, *Drosophila* represent an attractive animal model  
112 for the analysis of basic mitochondrial biology, offering a complex physiological system for the  
113 generation and study of complex I genetic variants at the whole organism or tissue-specific  
114 level, as well as the involvement of complex I in differing physiological conditions.

115

116 To date, no detailed molecular studies of *Drosophila* complex I have been pursued to confirm  
117 its structural and functional similarity with the mammalian enzyme, or exploit its potential as a  
118 metazoan model system. Therefore, we sought here to structurally and biochemically evaluate  
119 *Drosophila* as a model system for mammalian complex I. We determine structures for three  
120 distinct conformational states of the *Drosophila* enzyme and compare them to well-  
121 characterized resting states of the mammalian complex, leading to new insights into the  
122 mammalian active/deactive transition and enhancing understanding of the conformational link  
123 between the ubiquinone-binding site and the proximal membrane domain. We thus present  
124 detailed knowledge of *Drosophila* complex I at the molecular level and confirm and define its  
125 relationships to the mammalian enzyme.

126

127

## 128 Results

129

### 130 **The 43-subunit structure of *Drosophila* complex I**

131

132 Complex I was isolated from mitochondrial membranes prepared from whole adult *Drosophila*  
133 by detergent extraction from the membrane followed by anion-exchange and size-exclusion  
134 chromatography, according to a small-scale protocol developed previously for mammalian  
135 complex I (Agip et al., 2018). The complex eluted from the size-exclusion column in a  
136 homogeneous peak consistent with the expected ~1 MDa mass of the monomeric complex  
137 (Figure 1 – Figure Supplement 1) and the highest concentration peak fraction (3.4 mg mL<sup>-1</sup>)  
138 was collected and frozen onto thiol-modified gold cryo-EM grids (Blaza et al., 2018; Meyerson  
139 et al., 2015; Russo and Passmore, 2014). The grids were imaged using a 300 KeV Titan Krios  
140 microscope equipped with a Gatan K2 camera and GIF Quantum energy filter (Table 1) and

141 63,471 particles images were selected and processed using *RELION* (Zivanov et al., 2020,  
142 2018) into three major classes (Figure 1 – Figure Supplement 2). The highest resolution map  
143 reached an estimated global resolution of 3.3 Å with consistent local resolution, and the two  
144 smaller subclasses reached estimated global resolutions of 3.7 and 4.0 Å (Figure 1 – Figure  
145 Supplement 3). Example densities are shown in Figure 1 – Figure Supplements 4, 5, and 6.

146  
147 Figure 1 shows the overall structure of *Drosophila* complex I, which consists of 43 subunits:  
148 14 core subunits (Figure 1a) and 29 supernumerary subunits (Figure 1b). The 14 core subunits  
149 comprise the canonical heart of the enzyme that is conserved throughout all species of  
150 complex I, with the core subunits of the *Drosophila* and mammalian [bovine, PDB ID: 7QSK  
151 (Chung et al., 2022b)] enzymes exhibiting an overall RMSD of 1.065 Å. The 29 supernumerary  
152 subunits all correspond to supernumerary subunits found in mammalian complex I, confirming  
153 the close relationship between them. However, two supernumerary subunits present in  
154 mammalian complex I are absent from the *Drosophila* complex (Figure 1c): subunits NDUFC1  
155 and NDUFA2 (to aid comparisons to the mammalian enzyme, we use the human  
156 nomenclature throughout; see, for example (Rhooms et al., 2020) for a list of the  
157 corresponding gene names in *Drosophila*). NDUFC1 is a short, single transmembrane helix  
158 (TMH)-containing subunit in the membrane domain that is peripherally associated with the  
159 mammalian complex through its interaction with subunit NDUFC2, and subunit NDUFA2 binds  
160 to subunit NDUFS1 at the top of the hydrophilic domain in the mammalian complex. The  
161 absence of NDUFC1 was expected since no orthologue was identified in the *Drosophila*  
162 genome by bioinformatic analyses (Gabaldón et al., 2005), and in *Drosophila* the N-terminus  
163 of NDUFC2 is displaced by the C-terminal extension of NDUFA11 (see Figure 1 – Figure  
164 Supplement 5). Based on the same bioinformatic analyses, subunit NDUFA3 was also  
165 expected to be absent, but a matching subunit (Dmel gene CG9034) was detected by mass  
166 spectrometry in our preparation (see Methods) and is clearly present in our density map in the  
167 location of mammalian-NDUFA3 in the membrane domain (see Figure 1 – Figure Supplement  
168 6). However, the sequence homology is weak and the structures of the two proteins diverge  
169 in the C-terminal membrane-extrinsic domain, with the obtuse-angled ‘turn’ that follows the  
170 TMH in the mammalian protein sterically blocked by the marginally extended C-terminal TMH  
171 of ND1 in *Drosophila*. NDUFA2, which has a characteristic thioredoxin fold and is widely  
172 conserved in eukaryotic complex I, is surprisingly absent from our *Drosophila* structure despite  
173 a highly conserved homologue in the *Drosophila* genome (Gabaldón et al., 2005). However,  
174 NDUFA2 interacts with only subunit NDUFS1 in the mammalian complex, and inspection of  
175 the (otherwise highly conserved) region of interaction in the *Drosophila* enzyme shows local  
176 disorder in a specific helix in the *Drosophila* NDUFS1 subunit (residues 673–684) that binds  
177 NDUFA2 in the mammalian enzyme. Although this result suggests NDUFA2 is associated

178 with *Drosophila* complex I *in vivo* but has been lost during enzyme purification, detailed  
179 transcriptomic analyses (Brown et al., 2014; Leader et al., 2018) show that NDUFA2  
180 (*Drosophila* ND-B8) expression is restricted principally to the male germline, and therefore the  
181 NDUFA2 protein is unlikely to be a constitutive component of complex I in somatic tissues.

182  
183 Overall, *Drosophila* complex I is remarkably similar in its composition and structure to the  
184 mammalian enzyme, underlining expectations of the value of *Drosophila* as a model system  
185 for complex I research. Only further minor differences are present in some of the subunits  
186 (Figure 1 – Figure Supplement 5). ND5-TMH1 is absent from the *Drosophila* subunit: although  
187 ND2, ND4, and ND5 have a canonical 14-TMH core structure, truncation of the N-terminal  
188 TMHs appears tolerated, consistent with them lacking specific catalytically active residues or  
189 features, and demonstrated by the 11-TMH form of subunit ND2 in bilateria that lacks the three  
190 N-terminal TMHs found in lower organisms (Birrell and Hirst, 2010). In addition, the structures  
191 of supernumerary subunits NDUFB6 and NDUFB1 are noticeably different in the *Drosophila*  
192 enzyme (Figure 1 – Figure Supplement 5). Notably, all the substantial differences in the  
193 membrane domain (absence of NDUFC1 and ND5-TMH1, variations in NDUFA3, NDUFB6  
194 and NDUFB1, extension of NDUFA11) are located on the ‘right’ side of the boot-shaped  
195 enzyme, perhaps because there is less evolutionary pressure on the right side than on the  
196 left, where interactions with complexes III and IV are central to the stabilisation of respiratory  
197 chain supercomplexes (Milenkovic et al., 2017).

### 198 199 **Three distinct states of *Drosophila* complex I**

200  
201 Cryo-EM particle classification identified three distinct states in our preparation of *Drosophila*  
202 complex I, which we refer to as *Dm1*, *Dm2* and *Dm3* (Figure 1 – Figure Supplement 2). The  
203 *Dm1* class is the dominant class, containing ~60% of the particles, whereas the two minor  
204 classes, *Dm2* and *Dm3*, each contain ~20%. On a global scale (Figure 2), the *Dm2* state is  
205 ‘twisted’ relative to the *Dm1* state: with the two models aligned on subunit ND1 in the ‘heel’ of  
206 the complex, the hydrophilic and membrane domains twist in opposite directions (there is no  
207 apparent opening or closing of the angle between the domains). A similar twisting relationship  
208 was identified between the active and deactive resting states of mammalian complex I (Zhu  
209 et al., 2016). However, standard biochemical assays used to detect the presence of the  
210 mammalian deactive state did not detect any deactive *Drosophila* enzyme, even after  
211 incubation at 37 °C to promote deactivation (Figure 2 – Figure Supplement 1), indicating that  
212 *Dm2* is not directly comparable to the mammalian-type deactive state. In the mammalian  
213 deactive state, the equivalent residue to ND3-Cys41 (we use *Drosophila* numbering  
214 throughout) is exposed to solution and can be derivatised by *N*-ethylmaleimide (NEM),

215 preventing reactivation of the deactive enzyme and its return to catalysis, whereas in the active  
216 state ND3-Cys41 is buried (Galkin et al., 2008). Our assays suggest that either ND3-Cys41 is  
217 buried and inaccessible to derivatisation in all three *Dm1*, *Dm2* and *Dm3* states, or that ND3-  
218 Cys41 is exposed in one or more state that is completely inactive, being unable to either  
219 reactivate or catalyse. For the *Dm3* state, the most obvious global feature (Figure 2) is that  
220 the membrane domain appears ‘cracked’ at the interface between ND2 and ND4; the density  
221 for the adjacent subunit NDUFA11 is disordered, along with the adjacent N-terminus of  
222 NDUFS2 (Figure 2 – Figure Supplement 2). These characteristics resemble those of the  
223 ‘slack’ state of bovine complex I (Chung et al., 2022b; Zhu et al., 2016), which is of uncertain  
224 biochemical and physiological relevance and which may result from destabilisation of the  
225 membrane-intrinsic domain following extraction from the membrane and delipidation by  
226 detergents during purification. To evaluate the three states of ‘resting’ *Drosophila* complex I  
227 further, we first focus on the largest *Dm1* state, and its relationship with known resting states  
228 of the mammalian enzyme.

229

### 230 ***Dm1* is the active resting state of *Drosophila* complex I**

231

232 In addition to differing in their global conformations, the mammalian active and deactive states  
233 are differentiated by the status of a set of local features in the core subunits (Agip et al., 2018;  
234 Blaza et al., 2018; Chung et al., 2022b, 2022a; Zhu et al., 2016). In the *Dm1* state of *Drosophila*  
235 complex I these features are all unambiguously in the active state (Figure 3a). First, ND6-  
236 TMH3 is clearly  $\alpha$ -helical, it does not contain the  $\pi$ -bulge that is characteristic of the deactive  
237 state, and ND1-TMH4 is clearly in the ‘bent’ conformation of the active state (with Tyr149  
238 pointing toward the E-channel), not the straight conformation of the deactive state (with Tyr149  
239 pointing away from the E-channel). Second, the densities for the NDUFS2- $\beta$ 1- $\beta$ 2 loop that  
240 carries the His ligand to bound ubiquinone, the ND3-TMH1-2 loop that carries Cys41 (the  
241 biochemical-marker of the mammalian active/deactive states), and the ND1-TMH5-6 loop,  
242 are all well-defined in the *Dm1* density map and their conformations match the mammalian  
243 active-state conformations (they are not disordered as in the deactive state). ND3-Cys41,  
244 NDUFS2-His93 and ND1-Tyr134 meet in a trigonal junction at the top of ND1-TMH4 (Grba  
245 and Hirst, 2020), as they do in the active- state (Figure 3c). Finally, the FRASPR motif in  
246 NDUFS7 that includes Arg119 matches its conformation in the mammalian active, not  
247 deactive, state.

248

249 Importantly, as expected from the ordered states of the loop structures that form the  
250 ubiquinone-binding site, the site is sealed and closed from the matrix (Figure 3b-c) as in the



251 mammalian active state, not open to the matrix as in the deactive state (Agip et al., 2018;  
252 Blaza et al., 2018; Chung et al., 2022b, 2022a; Zhu et al., 2016). This observation indicates  
253 that the *Dm1* state is a catalytically competent state, ready to bind and reduce the extended  
254 and hydrophobic ubiquinone-9 or ubiquinone-10 substrate (referred to as Q<sub>9</sub> for brevity).  
255 Indeed, density for Q<sub>9</sub> is observed within the site, although the Q<sub>9</sub> is only partially inserted,  
256 with its ubiquinone-headgroup in the central section of the channel, rather than ligated to the  
257 two proton-donor ligands NDUFS2-His97 and NDUFS2-Tyr146 as required for its reduction  
258 (Baradaran et al., 2013; Tocilescu et al., 2010). Partially-inserted ubiquinones have been  
259 observed previously in several different species and states of complex I (Gu et al., 2022;  
260 Kampjut and Sazanov, 2020; Kravchuk et al., 2022; Parey et al., 2019; Soufari et al., 2020),  
261 but the headgroup typically sits slightly lower down the channel than observed here, in an  
262 array of positions distributed largely around the hydrophilic ‘kink’ of the channel (Figure 3 –  
263 Figure Supplement 1). The *Drosophila* Q<sub>9</sub> headgroup is bound 11 and 14 Å away, respectively,  
264 from its proposed ligating partners NDUFS2-His97 and NDUFS2-Tyr146, between the ‘1<sup>F</sup>’ site  
265 described in *Sus scrofa* complex I (Gu et al., 2022) and the ‘Q<sub>m</sub>’ site described in *Escherichia*  
266 *coli* (Kravchuk et al., 2022). The wide spectrum of headgroup positions identified in different  
267 complex I structures suggests that substrates may shuttle in a step-wise manner, occupying  
268 numerous sites of localised energy minima (Chung et al., 2021; Teixeira and Arantes, 2019;  
269 Warnau et al., 2018). Thus, although the site observed here is clearly separated from the  
270 reactive site, it is thus only broadly defined and not a highly specific site.

271

### 272 **Modified domain disposition between the *Drosophila* and mammalian active states**

273

274 In the mammalian complex, two subunits, NDUFA5 on the hydrophilic domain and NDUFA10  
275 on the membrane domain, meet in the corner of the L-shape forming an interface between the  
276 two domains. Upon deactivation of the mammalian enzyme, the altered disposition of the  
277 hydrophilic and membrane domains changes the NDUFA5/NDUFA10 interface and  
278 decreases their contact area (Agip et al., 2018; Zhu et al., 2016). The nature and extent of the  
279 interface thereby provides an easy way to evaluate the active/deactive status of mammalian  
280 structures. Both subunits are present in the *Drosophila* enzyme and Figure 4a compares their  
281 relative positions in the *Dm1* active state to their relative positions in the active and deactive  
282 mammalian states. With the structures aligned to subunit NDUFA10, subunit NDUFA5, which  
283 is dominated by a three-helix bundle, clearly lies in an intermediate position in the *Dm1* state,  
284 it does not overlay its position in the mammalian active state. The N-terminus of hydrophilic-  
285 domain subunit NDUFS2 that runs along the top of the membrane domain is also in an  
286 intermediate position. However, the NDUFA5/NDUFA10 contact area still matches closely to  
287 that observed in the mammalian active state (388 Å<sup>2</sup> vs. 354 and 131 Å<sup>2</sup> in the bovine active

288 and deactive states (Chung et al., 2022b), respectively), and the NDUFA5/NDUFA10 interface  
289 is clearly different as it incorporates the N-terminus of the NDUFS4 subunit (residues 33–49;  
290 Figure 4b), which is substantially extended relative to in mammalian species (Figure 4c).  
291 Contacts between the NDUFS4 N-terminal ‘tether’ and subunits NDUFA5 and NDUFA10 of  
292 182 and 427 Å<sup>2</sup>, respectively, further stabilise the interface and, by extension, the relative  
293 disposition of the hydrophilic and membrane domains in the *Drosophila Dm1* active state.

294

295 Further comparison of the mammalian and *Drosophila* active-state structures showed that  
296 subunits NDUFS2, NDUFS7 and ND1 that constitute the ubiquinone-binding site (Figure 3),  
297 overlay closely [RMSD 0.574 between *Dm1* and the bovine active state (PDB ID: 7QSK)  
298 (Chung et al., 2022b)] but that the structures then diverge along the membrane domain,  
299 shifting the position and orientation of subunit ND2 (Figure 5a). As NDUFA5 is bound to  
300 NDUFS2 and NDUFA10 to ND2, their relative positions thus also change. Within the  
301 connecting subdomain between ND1 and ND2 that contains subunits ND3, ND6 and ND4L,  
302 the arrangement of the TMHs in subunit ND6 (Figure 5b) clearly differs between the  
303 *Drosophila* and mammalian enzymes (despite them both containing a fully  $\alpha$ -helical ND6-  
304 TMH3). In particular, ND6-TMH4 is markedly displaced, enhancing a cleft between ND6 and  
305 ND1 in which three phospholipid molecules are observed (Figure 1 – Figure Supplement 4).  
306 The position of ND6-TMH4 is remarkably variable between different species and states of  
307 complex I, suggesting that it is not functionally important (Figure 5 – Figure Supplement 1).  
308 Structures around ND6-TMH4 also vary (Figure 5b-c): i) the ND6-TMH4–5 loop is restructured  
309 and its  $\beta$ -hairpin disrupted by neighbouring ND4L-TMH1, ii) ND6-TMH1 is displaced away  
310 from TMH4 to avoid steric clashes, iii) the ND6-TMH3–4 loop is restructured to accommodate  
311 the movement of TMH4, and iv) the C-terminal loop of NDUFA9, located just above the  
312 reordered ND6-TMH3–4 loop, is retracted. The ND3-TMH1–2 loop, which is also adjacent to  
313 the restructured region, remains ordered with ND3-Cys41 occluded (Figure 5c). Strikingly, the  
314 residues of the central axis that link the terminus of the E-channel to the start of the first  
315 antiporter-like subunit (ND2) are not affected by the altered connecting subdomain structure,  
316 which thus adjusts the relative disposition of subunits in the hydrophilic and membrane  
317 domains in the *Drosophila Dm1* state *without* affecting the catalytic machinery of the active  
318 state structure.

319

### 320 **Minor states with restricted deactive characteristics**

321

322 Inspection of the set of local features in the core subunits (Agip et al., 2018; Blaza et al., 2018;  
323 Chung et al., 2022b, 2022a; Letts et al., 2019; Zhu et al., 2016) that differentiate the

324 mammalian active and deactive states in the two minor states revealed that both the *Dm2* and  
325 *Dm3* states also most closely correspond to the mammalian active state. Figure 6a shows  
326 that, in the *Dm2* state, two features of the mammalian deactive state are present: a  $\pi$ -bulge  
327 has formed in ND6-TMH3 and ND1-TMH4-Tyr149 has 'flipped' its conformation (Chung et al.,  
328 2022b; Grba and Hirst, 2020; Kampjut and Sazanov, 2020). However, all the other key  
329 elements remain in their active states, including ND1-TMH4, which remains in its bent  
330 conformation, and as a result the ubiquinone-binding site remains enclosed and sealed from  
331 the matrix (Figure 6b-c). The same is true for the *Dm3* state (Figure 6 – Figure Supplement  
332 1). Notably, the trigonal junction between ND3-Cys41, NDUFS2-His93 and ND1-Tyr134 (Grba  
333 and Hirst, 2020) is preserved in all three states, occluding the Cys from the matrix and  
334 explaining why a mammalian-type deactive state of *Drosophila* complex I could not be trapped  
335 in biochemical assays (Figure 2 – Figure Supplement 1). We conclude that, in contrast to the  
336 mammalian enzyme, *Drosophila* complex I does not form an 'open' resting state, it rests only  
337 in 'closed' conformations with the ubiquinone-binding site enclosed and sealed from the  
338 matrix.

339

340 Further comparison of the *Dm1* and *Dm2* states (Figure 7a-b) shows that the 'twisting' motion  
341 that relates their global conformations originates in changes in the 'connecting subdomain'  
342 between the rigid and mobile subdomains described in Figure 5a, where the deactive-like  
343 elements of *Dm2* are located (the  $\pi$ -bulge in ND6-TMH3 and ND1-TMH4-Tyr149). The twisting  
344 motion displaces the N-terminus of subunit NDUFS2 (adjacent to ND6-TMH5) and changes  
345 the NDUFA5/NDUFA10 interface, displacing and disordering the N-terminus of subunit  
346 NDUFS4 (Figure 7c) and causing a small decrease in the interface area (from 388 Å<sup>2</sup> in *Dm1*  
347 to 333 Å<sup>2</sup> in *Dm2*, relative to 354 and 131 Å<sup>2</sup> in the active and deactive states of bovine  
348 complex I (Chung et al., 2022b)). Inspection of the region around the  $\pi$ -bulge in ND6-TMH3  
349 revealed a further striking change between the *Dm1* and *Dm2* states. In *Dm1*, the tail of a  
350 phosphatidylcholine molecule is intercalated into the structure, sterically obstructing the  
351 rotation of bulky residues on ND6-TMH3 around the helical axis to form the  $\pi$ -bulge (Figure  
352 7a-b). It is absent from the *Dm2* state (and also from *Dm3*, where the local protein  
353 conformation matches *Dm2* (Figure 6 – Figure supplement 1)). In the *Dm1* state the  
354 phosphatidylcholine headgroup stabilises the ND6-TMH3–4 loop at the top of ND6-TMH4,  
355 whereas its absence in *Dm2* allows the TMH3–4 loop and TMH4 to move, along with a further  
356 adjustment to the adjacent C-terminal loop of NDUFA9 and displacement of ND3-TMH2–3.  
357 The lipid may either have been ejected during relaxation of ND6-TMH3 into a  $\pi$ -bulge  
358 structure, or removed during detergent extraction, promoting  $\pi$ -bulge formation.

359

## 360 Discussion

361

362 The structures determined here for *Drosophila* complex I confirm its close relationships with  
363 mammalian complex I and thus its potential as a powerful genetically tractable model system  
364 for studying mammalian-specific aspects of complex I biology. The close-to identical subunit  
365 compositions and structures of the mammalian and *Drosophila* enzymes now enable genetic  
366 approaches to be applied to elucidate, for example, the roles of the supernumerary subunits,  
367 the assembly pathway, and the detrimental effects of clinically identified pathological point  
368 mutations. Importantly, these aspects can be studied in physiologically relevant *in vivo*  
369 environments and in specific cell types and tissues, extending the scope of earlier studies in  
370 cultured mammalian cells (Guerrero-Castillo et al., 2017; Stroud et al., 2016). However, our  
371 structures also reveal limitations in *Drosophila* as a model organism for complex I, as the  
372 *Drosophila* enzyme, despite its remarkable similarity to the mammalian enzyme, does not  
373 undergo the full mammalian-type active/deactive transition. Our cryo-EM analyses revealed  
374 the major class of enzyme particle (*Dm1*) in the active resting state, with all the characteristics  
375 of the mammalian active state enzyme. Two minor states (*Dm2* and *Dm3*) also more closely  
376 resemble the active state, and we were unable to either detect a mammalian-type deactive  
377 resting state in biochemical assays, or to generate it by incubation of the enzyme at 37 °C,  
378 the method used to deactivate mammalian complex I. However, we note that our biochemical  
379 assay relies on the availability of Cys41-ND3, just one characteristic that distinguishes the  
380 mammalian active and deactive states; the functional consequences of conversion to the *Dm2*  
381 state are currently unknown, most notably whether it is (like the mammalian active state) able  
382 to catalyse RET, or (like the mammalian deactive state) unable to do so.

383

384 Comparison of the *Dm1* (active) and *Dm2* (twisted) structures of *Drosophila* complex I  
385 determined here suggest that the *Dm2* state is a relaxed state, which may be considered a  
386 structurally curtailed form of the full mammalian-type deactive transition (Agip et al., 2018;  
387 Blaza et al., 2018; Chung et al., 2022b, 2022a; Zhu et al., 2016). In changes that also occur  
388 in the mammalian transition, a  $\pi$ -bulge forms in ND6-TMH3, and the nearby sidechain of ND1-  
389 TMH4-Tyr149 flips in conformation. These limited and local changes in the ND6 region result  
390 in a limited twisting of the global conformation in the *Dm2* state, a motion that qualitatively  
391 resembles (but to a much lesser extent) the twisting of the deactive enzyme. However, the  
392 cascade of changes that also occurs in the mammalian-type deactive transition does not  
393 follow: ND1-TMH4 does not straighten its conformation, the trigonal junction between ND3-  
394 Cys41, NDUFS2-His93 and ND1-Tyr134 is preserved, and so the conformational change from  
395 ND6-TMH3 does not propagate to the ubiquinone-binding site — which remains fully ordered,

396 sealed from the matrix, and in its active state (Figure 6). This lack of transmission from the  $\pi$ -  
397 bulge to the ubiquinone-binding site (Figure 8) argues against a direct link between the two  
398 being crucial for catalysis (Kampjut and Sazanov, 2022, 2020; Kravchuk et al., 2022).  
399 Although structures of complex I from other (non-mammalian) species have also been  
400 reported with a  $\pi$ -bulge in ND6-TMH3 but without the ‘opening’ of the ubiquinone-binding site  
401 observed in the mammalian deactive state (Chung et al., 2022a), our *Drosophila Dm2*  
402 structure is the first example in which the  $\pi$ -bulge and a fully ordered, active ubiquinone-  
403 binding site have been observed together. Our structures are consistent with the elements  
404 that change during the mammalian deactive transition being mobile during catalysis, but do  
405 not suggest that they move in a coherent and coordinated transition to a fully deactive-type  
406 state, with the ubiquinone-binding site open to the matrix, during catalysis.

407  
408 The observation, together, of the active *Dm1* state and the curtailed-deactive *Dm2* state raises  
409 two questions: what causes the  $\pi$ -bulge to form in *Dm2*, and why does the conformational  
410 cascade to the mammalian-type deactive state not occur in the *Drosophila* enzyme (Figure  
411 8)? First, it is possible that delipidation of the complex during detergent extraction removes  
412 the intercalated phospholipid that obstructs  $\pi$ -bulge formation in the *Dm1* state, allowing  
413 conversion to *Dm2*. However, a similar intercalated phospholipid has not been observed in  
414 any mammalian active-state structure, so it may only bind when catalysis stops, or be an  
415 artefact of enzyme purification. Indeed, if ND6-TMH3 converts between its  $\pi$ -bulge and  $\alpha$ -  
416 helical structures during catalysis (Agip et al., 2018; Kampjut and Sazanov, 2020; Kravchuk  
417 et al., 2022; Parey et al., 2021; Röpke et al., 2021), then the intercalating phospholipid is very  
418 unlikely to be present in the  $\alpha$ -helical state, moving repeatedly in and out. Alternatively, it is  
419 possible that enzyme twisting, induced by loss of the NDUFS4 tether from the  
420 NDUFA5/NDUFA10 interface during purification, causes the  $\pi$ -bulge to form: this possibility  
421 may be addressed in future by genetic truncation of the NDUFS4 tether from the N-terminus  
422 of the mature subunit. Second, if formation of the  $\pi$ -bulge in *Drosophila* represents a curtailed  
423 deactive transition, then conversion to a full mammalian-type deactive state would be  
424 accompanied by further twisting, disruption of the NDUFA5/NDUFA10 interface, and  
425 destructuring of the ubiquinone-binding site. That these changes are not observed in  
426 *Drosophila* complex I is likely due to the modified domain disposition in the *Dm1* state that is  
427 stabilised by the structure of the connecting subdomain and accommodating changes in linked  
428 structures such as the NDUFA5/NDUFA10 interface. We propose that the stable domain  
429 disposition is resistant to further twisting and so resists the local changes that accompany it in  
430 the mammalian deactive transition. Computational simulations of the *Dm1* structure may help  
431 to further elucidate the answer to this question in future. Notably, our proposal implies high

432 activation energy barriers for the ‘opening’ of the ubiquinone-binding site to the matrix in the  
433 *Drosophila* enzyme, arguing against opening and closing of the site during catalysis (Kampjut  
434 and Sazanov, 2020; Kravchuk et al., 2022).

435

436 The *Dm3* ‘cracked’ state is not discussed in detail here as we suspect it is an artefact resulting  
437 from detergent-induced loss of stability in the distal membrane domain of the *Dm2* state.  
438 Similar opening and relaxation of the ND2–ND4 interface has also been observed in the ‘slack’  
439 state of bovine complex I (Chung et al., 2022b; Zhu et al., 2016), as well as in a catalytically  
440 inactive state of complex I from rhesus macaque (Agip et al., 2019), and in pronounced open  
441 states of the ovine complex (Kampjut and Sazanov, 2020). In all cases, opening of the ND2–  
442 ND4 interface is linked to loss of density for nearby subunit NDUFA11, and to changes in the  
443 C-terminal section of the ND5 transverse helix and anchor helix (Figure 2 – Figure Supplement  
444 2). It may result from delipidation during enzyme purification, most likely removal of  
445 phospholipids from the interface on both sides of the complex, including ‘behind’ the  
446 transverse helix (Figure 1 – Figure Supplement 4b). Consistent with this picture, treatment of  
447 the mammalian enzyme with zwitterionic detergents or prolonged incubation in detergent  
448 solution leads to fractionation at this interface (Hirst et al., 2003; Zhu et al., 2015).

449

450 The deactive transition and RET are linked in mammalian complex I biology, as deactivation  
451 protects against the burst of ROS production that occurs upon reperfusion by RET (RET-  
452 ROS), driven by oxidation of the reduced succinate pool that accumulates during ischaemia,  
453 leading to IR injury (Dröse et al., 2016; Galkin and Moncada, 2017; Wright et al., 2022; Yin et  
454 al., 2021). The deactivation of complex I minimises the RET-ROS burst and tissue damage  
455 upon reperfusion because the deactive state of mammalian complex I is unable to catalyse  
456 RET (Kotlyar and Vinogradov, 1990; Wright et al., 2022; Yin et al., 2021). An elegant  
457 demonstration is provided by the ND6-P25L variant of mouse complex I, which deactivates  
458 much more rapidly than the wild-type enzyme, preventing RET-ROS catalysis and thereby  
459 protecting against IR injury (Yin et al., 2021). Strikingly, while *Drosophila* do not appear to  
460 adopt a deactive state, they are able to survive long periods of hypoxia followed by  
461 reoxygenation (Haddad, 2006; Zhou and Haddad, 2013), raising the question of whether they  
462 are protected by a corresponding mechanism. ROS production by RET has been described  
463 in studies of *Drosophila* mitochondria (although not demonstrated directly in the isolated  
464 enzyme) (Scialò et al., 2016), and the ability of *Drosophila* complex I to catalyse RET is  
465 consistent with it persisting in the active state (*Dm1*) when catalysis stops, rather than  
466 deactivating. Alternative mechanisms are therefore required to explain the resistance of  
467 *Drosophila* to hypoxia–reoxygenation challenges, such as greater robustness to oxidative  
468 stress from a RET-ROS induced stress-responsive transcriptional programme (Scialò et al.,

469 2020) and/or metabolic adaptations (Perkins et al., 2012). Future genetic studies that exploit  
470 structural insights and will illuminate these mechanisms and provide new perspectives on the  
471 mechanisms of mammalian complex I.

472

473

## 474 Material and methods

475

### 476 ***Drosophila* stocks and husbandry**

477

478 Flies of a common wild type-equivalent genotype, isogenic  $w^{1118}$  (RRID:BDSC\_6326), were  
479 obtained from Bloomington *Drosophila* Stock Center (RRID:SCR\_006457), raised and kept  
480 under standard conditions in a temperature-controlled incubator with a 12h:12h light:dark  
481 cycle at 25 °C and 65% relative humidity, on food consisting of agar, cornmeal, molasses,  
482 propionic acid and yeast. Approximately 5,500 mixed adults collected five days after eclosion  
483 were used for the preparation of the cryo-EM sample.

484

### 485 **Preparation of *Drosophila* complex I**

486

487 All experimental procedures were carried at 4 °C unless otherwise stated. One volume of  $w^{1118}$   
488 flies (1 mL is equivalent to ~100 flies) was mixed with five volumes of homogenisation buffer  
489 containing 20 mM Tris-HCl pH 7.8, 250 mM sucrose, 2 mM EDTA, 2mM EGTA, 1% (w/v) fatty  
490 acid-free bovine serum albumin (BSA, Merck) and 1x EDTA-free cComplete™ protease  
491 inhibitor cocktail (Roche) (one tablet per 50 mL of buffer). Mitochondria were prepared using  
492 a differential centrifugation method. Briefly, 20 mL of fly suspension were homogenised by 10  
493 strokes with a motor-driven Teflon pestle at 1,300 rpm in a 30 mL Wheaton glass  
494 homogeniser. The homogenate was then centrifuged at 1,000 x  $g$  for 5 min, and the  
495 supernatant filtered through a muslin cloth to remove cuticles. The same process was  
496 repeated a second time. Then, mitochondria were pelleted at 3,000 x  $g$  for 10 min and washed  
497 with 5 mL of homogenisation buffer but without BSA. Finally, mitochondria were collected by  
498 centrifugation at 7,000 x  $g$  for 10 min and resuspended in 5.8 mL (56 mg of protein) of  
499 resuspension buffer containing 20 mM Tris-HCl (pH 7.8), 20% glycerol (v/v), 2 mM EDTA,  
500 2mM EGTA, 1% and 1x EDTA-free cComplete™ protease inhibitor cocktail (one tablet per 50  
501 mL of buffer). Isolated mitochondria were stored at -80 °C until further use. Mitochondrial  
502 membranes were prepared as described previously for mouse samples (Agip et al., 2018).  
503 Defrosted mitochondria were diluted to 5 mg mL<sup>-1</sup> in resuspension buffer then ruptured on ice  
504 with a Q700 Sonicator (Qsonica) in three intervals (5 s bursts each followed by a 30 s pause)  
505 at an amplitude setting of 65%. Membranes (38 mg of protein) were collected by centrifugation

506 at 75,000 x *g* for 1 hr, then resuspended to 4.9 mg mL<sup>-1</sup> in the same buffer and stored at -80  
507 °C.

508

509 Purification of *Drosophila melanogaster* complex I followed the same procedure as previously  
510 described for mouse complex I, with minor adjustments (Agip et al., 2018). While being  
511 continuously stirred on ice, mitochondrial membranes (7.6 mL at 4.9 mg mL<sup>-1</sup>) were solubilised  
512 for 30 min by the drop-wise addition of dodecyl-β-D-maltoside (DDM) to a final concentration  
513 of 0.75% from a 10% stock solution. The solubilised membranes were then centrifuged at  
514 48,000 x *g* for 30 min and the clarified supernatant loaded on to a Hi-Trap Q HP anion  
515 exchange column (1 ml; Cytiva) pre-equilibrated with elution buffer A (20 mM Tris-HCl pH 7.8  
516 °C, 2 mM EDTA, 2 mM EGTA, 0.1% DDM, 10% ethylene glycol (v/v, VWR), 0.005% asolectin  
517 (Avanti) and 0.005% CHAPS (Calbiochem)) and operated at a flow rate of 0.3 mL min<sup>-1</sup>. The  
518 column was washed with several column volumes of buffer A until the 280 nm absorbance  
519 reached the baseline. Unwanted proteins were eluted with seven column volumes of 20%  
520 buffer B (buffer A + 1 M NaCl), then complex I was eluted with an additional seven column  
521 volumes of 35% buffer B. Fractions containing complex I (ca. 3 mL) were pooled and  
522 concentrated to ca. 100 µL using an Amicon-Ultra filter device (100 kDa molecular weight cut  
523 off; Amicon®, Millipore). The concentrated sample was then injected onto a Superose 6™  
524 Increase size exclusion column (150 x 5 mm; Cytiva) pre-equilibrated in buffer C (20 mM Tris-  
525 HCl pH 7.8 °C, 150 mM NaCl and 0.05% DDM) operated at a flow rate of 0.03 mL min<sup>-1</sup>. All  
526 chromatographic procedures described were carried out using an ÄKTA micro FPLC system  
527 (Cytiva) with elution monitored at 280 and 420 nm. Complex I concentrations were estimated  
528 at 280 nm ( $\epsilon = 0.2 \text{ mg mL}^{-1} \text{ mm}^{-1}$ ). The total collected protein was estimated at 0.6 mg, and  
529 the peak concentration was 3.4 mg mL<sup>-1</sup>.

530

### 531 **Kinetic activity measurements**

532

533 All activity measurements were measured on a 96-well Spectramax 384 plate reader at 32 °C.  
534 For NADH:decylubiquinone (dQ) oxidoreductase activities, NADH (200 µM final  
535 concentration) was used to initiate catalysis by complex I (0.2 µg mL<sup>-1</sup>) with 200 µM dQ, 0.15%  
536 (w/v) asolectin, and 0.15% (w/v) CHAPS in 20 mM Tris-HCl (pH 7.55). NADH oxidation was  
537 monitored at 340–380 nm ( $\epsilon = 4.81 \text{ mM}^{-1} \text{ cm}^{-1}$ ). The cryo-EM sample had an activity of  $7.3 \pm$   
538  $0.3 \text{ } \mu\text{mol min}^{-1} \text{ mg}^{-1}$  (mean  $\pm$  S.D.; *n* = 4).

539

540 For evaluation of the active/deactive state ratio of *Drosophila* complex I using the *N*-  
541 ethylmaleimide (NEM) assay (Galkin et al., 2008; Yin et al., 2021), 4 mg mL<sup>-1</sup> mitochondria  
542 were incubated with 2 mM NEM or the equivalent volume of DMSO on ice for 20 min., before



543 determining the NADH:O<sub>2</sub> oxidoreductase activity. The mitochondria had been frozen for  
544 storage before measurement. To attempt to deactivate the complex, the mitochondria were  
545 incubated at 37 °C for 30 min (equivalent to, or longer than, the treatments used to deactivate  
546 complex I in mammalian mitochondrial membranes (Agip et al., 2018; Blaza et al., 2018)).  
547 NADH:O<sub>2</sub> oxidoreductase activities were measured in 20 mM Tris-HCl (pH 7.55) using 10 µg  
548 mL<sup>-1</sup> mitochondria and 10 µg mL<sup>-1</sup> alamethicin, and initiated using 200 µM NADH. NADH  
549 oxidation was monitored as described above.

550

### 551 **Cryo-EM grid preparation and image acquisition**

552

553 UltrAuFoil® gold grids (0.6/1, Quantifoil) (Russo and Passmore, 2014) were prepared for  
554 *Drosophila* complex I as described previously (Blaza et al., 2018). First, the grids were glow  
555 discharged with plasma under vacuum for 90 s at 20 mA then incubated for seven days under  
556 anaerobic and room temperature conditions in a solution of 5 mM 11-mercaptoundecyl  
557 hexaethylene glycol (SPT-0011P6, SensoPath Technologies) (Meyerson et al., 2015). Grids  
558 were then washed several times in ethanol and left to dry. Complex I (3.4 mg mL<sup>-1</sup>) was then  
559 applied (3 µL per grid) to the treated grids in a Vitrobot Mark IV (Thermo Fisher Scientific) set  
560 to 4 °C and 100% relative humidity. Grids were blotted for 10 s with a force setting of -10,  
561 before being plunged into liquid ethane. Frozen grids were then stored in liquid nitrogen before  
562 screening and data collection.

563

564 Both cryo-EM screening and high-resolution image collection were carried out on a Titan Krios  
565 (Thermo Fisher Scientific) at University of Cambridge cryo-EM facility. The Titan Krios  
566 microscope for data collection was operating at an accelerated voltage of 300 kV and  
567 equipped with a Gatan K2 detector utilising a GIF quantum energy filter with a slit width of 20  
568 eV. The microscope was operated in electron counting mode with a nominal sampling rate of  
569 1.07 Å pix<sup>-1</sup> (nominal magnification of 130,000) and a dose rate of ca. 4.18 electrons Å<sup>-2</sup> s<sup>-1</sup>.  
570 The specimen was radiated for 10 s over 40 frames with a total exposure amounting to ca. 42  
571 electrons Å<sup>-2</sup>. A 100 µm and 50 µm objective and C2 aperture, respectively, were inserted  
572 during high-resolution imaging. The microscope was operated with EPU software and the  
573 defocus range was set to -1.0 to -2.0 µm, with an autofocus routine run every 5 µm.

574

### 575 **Cryo-EM data processing**

576

577 All 3,082 collected movies were subjected to processing by *RELION-3.0* and *3.1* (Zivanov et  
578 al., 2020, 2018) except where stated otherwise. Micrographs were motion-corrected using  
579 *MotionCor2* (Zheng et al., 2017) with 5x5 patches, and contrast transfer function (CTF)

580 parameters estimated using *CTFFIND-4.1* (Rohou and Grigorieff, 2015) in *RELION-3.0*. In  
581 parallel, the motion-corrected micrographs were exported and subjected to particle  
582 autopicking using a general model without training in *crYOLO 1.5.3* (Wagner et al., 2019),  
583 resulting in 194,538 picked particles. Ice contaminated micrographs were removed to give  
584 180,342 particles from 2,852 micrographs. Particles were extracted with an initial downscaling  
585 to 6.0 Å pixel<sup>-1</sup> (box size of 80) and subjected to initial 2D and 3D classification steps to remove  
586 junk particles, yielding a total of 93,332 particles. These particles were re-extracted at the  
587 nominal pixel size of 1.07 Å pixel<sup>-1</sup> (box size of 450) and used to reconstruct a 3.74 Å resolution  
588 map using the 3D autorefinement procedure in *RELION*, at the calibrated pixel size of 1.048  
589 Å pixel<sup>-1</sup> (Spikes et al., 2020). The active state map of mouse complex I (EMD-4345) (Agip et  
590 al., 2018) was used as a reference map for the 3D reconstruction. Bayesian polishing (Zivanov  
591 et al., 2019) was then applied and CTF parameters including astigmatism, defocus, and beam  
592 tilt estimated using the CTF refinement procedure in *RELION-3.0*. Particles were subjected to  
593 additional rounds of classifications, to further remove junk and bad complex I particles. From  
594 hereon, all data processing was performed in *RELION-3.1*, at the nominal pixel size of 1.07 Å  
595 pixel<sup>-1</sup>, then corrected to the calibrated pixel size of 1.048 Å pixel<sup>-1</sup> at the postprocessing or  
596 local resolution stages. The particles were subject to iterative rounds of CTF refinement  
597 (Zivanov et al., 2020), to estimate anisotropic magnification, beam tilt, trefoil, 4th order  
598 aberration, and per-particle defocus, astigmatism and *B*-factor parameters. Particles with an  
599 *rlnNrOfSignificantSamples* value greater than 3,000 were removed to give 65,864 particles.  
600 Using a complex I mask (generated from a working model using *RELION MaskCreate*) and  
601 with solvent flattening, the global resolution of the 3D refined map was 3.23 Å (according to a  
602 gold-standard Fourier shell correlation (FSC) of 0.143 (Rosenthal and Henderson, 2003)). 3D  
603 classification (number of classes, *K* = 5, local angular search to 0.2° sampling) was then  
604 performed, and three complex I classes, *Dm1*, *Dm2* and *Dm3*, were identified and retained,  
605 containing 37,608, 12,343, and 13,520 particles, respectively, a ratio of roughly 3:1:1. Using  
606 model-generated (*Dm1* and *Dm2*) or map-generated (*Dm3*) masks and solvent-flattening, the  
607 three classes refined to 3.28, 3.68, and 3.96 Å resolution, respectively. Global resolutions  
608 were estimated from two independent half maps using a gold-standard FSC of 0.143  
609 (Rosenthal and Henderson, 2003) in *RELION postprocess*. The final map was globally  
610 sharpened (or blurred) in *RELION postprocess* using user-provided *B*-factor values. The  
611 model-generated or map-generated mask used for 3D refinement procedures and resolution  
612 estimation was generated in *UCSF ChimeraX* (Pettersen et al., 2021) using the *molmap* (*Dm1*  
613 and *Dm2*) or *vop threshold* (*Dm3*) functions, before being low-pass filtered to 15 Å and having  
614 a 6-pixel soft cosine edge added using *RELION MaskCreate*. Local resolution was estimated  
615 using *RELION LocRes*. Mollweide projections were plotted using *Python* and *Matplotlib*, and

616 the degree of directional resolution anisotropy calculated using the *3DFSC* program suite (Tan  
617 et al., 2017).

618

### 619 **Model building, refinement, and validation**

620

621 Model coordinates were built into the 3.3 Å resolution *Dm1 Drosophila* complex I map, with a  
622 published mouse complex I structure (PDB ID: 6G2J) (Agip et al., 2018) serving as a homology  
623 model. *SWISS-MODEL* (Waterhouse et al., 2018) was used to generate an initial model for  
624 each subunit and the models rigid-body fitted into the map using *Chimera* (Pettersen et al.,  
625 2004). *MODELLER* (Webb and Sali, 2016) was used to generate models for subunits  
626 NDUFB6, NDUFB9 and NDUFB8 as the homology models were unsatisfactory. The sequence  
627 for the *Drosophila* NDUFA3 subunit (Uniport ID: Q9W380; Dmel gene *CG9034*; FlyBase ID:  
628 FBgn0040931) was identified in routine peptide mass spectrometry analyses of the purified  
629 enzyme. The evidence for Q9W380 relies on a single peptide (LGYVVYR, 9.1% coverage)  
630 but the MASCOT score is 43, well above 30 (the 99% confidence limit), and inspection of the  
631 distribution of tryptic cleavage sites suggests no further peptides would be expected to be  
632 detected. Models for subunits NDUFA2 and NDUFC1 were deleted due to the lack of  
633 corresponding densities in the cryo-EM maps, and N- and C-terminal extensions were built  
634 where necessary. It was noted that densities for the N-termini of ND1 and ND5 were extended  
635 beyond the reviewed UniProt sequences (P18929 and P18932, respectively). Therefore, to  
636 incorporate the correct translation start site, UniProt IDs C7DZL9 and C7DZL4 (Stewart and  
637 Beckenbach, 2009) were used to build models for subunits ND1 and ND5, respectively.  
638 UniProt ID A0A024E3A5 was used for subunit NDUFA9 to include a L174F mutation  
639 supported by the *Drosophila* cryo-EM density features. Notably, the N-terminus of core subunit  
640 NDUFS7 is resolved for the first time in *Drosophila* complex I (Figure 1 – Figure Supplement  
641 5). Preliminary model building and real-space refinements were carried out in *Coot 0.9-pre*  
642 (Casañal et al., 2020). Then GPU-powered *ISOLDE 1.0* (Croll, 2018), which implements a  
643 molecular dynamic approach to model refinement, was used to iterate through the model,  
644 improving the map-to-model fit, resolving clashes and maintaining good protein  
645 stereochemistry. Emerging modelling errors were monitored using a real-time validation  
646 functionality present in *ISOLDE* and corrected. Densities for existing and additional  
647 phospholipid molecules were identified with the *Unmodelled blobs* tool in *Coot 0.9.6.2*  
648 (Casañal et al., 2020). All non-cardiolipin phospholipids were modelled as  
649 phosphatidylethanolamines, the largest component of the phospholipid composition of the  
650 *Drosophila* mitochondrial membranes (Jones et al., 1992), unless density features indicated  
651 phosphatidylcholine to be more likely. Lipid tails were clipped where necessary using the

652 *delete* tools in *Coot* and *PyMOL* 2.5.2 (Schrodinger LLC, 2022). dGTP was modelled in subunit  
653 NDUFA10 (Molina-Granada et al., 2022). The model was then *Curlew* all-atom-refined using  
654 *Coot* and real-space refined against the active-state map using *phenix.real\_space\_refine* in  
655 *Phenix* 1.18.2-3874 (Liebschner et al., 2019) with custom geometry restraints. Ligand  
656 restraints were generated using *Phenix eLBOW*. No secondary structure restraints were used  
657 during real-space refinement of the *Dm1* model. The model was checked manually in *Coot*,  
658 new resolvable regions built, and rotameric and/or Ramachandran outliers corrected. Atom  
659 resolvabilities (*Q*-scores) were calculated using *MapQ* (Pintilie et al., 2020) and any persisting  
660 outliers identified and corrected. The model was then real-space refined in *Phenix* as  
661 described above to produce the final *Dm1* model.

662

663 To build the *Dm2* model, the *Dm1 Drosophila* model was rigid-body fitted into the *Dm2* map  
664 using the *Fit in map* tool in *UCSF ChimeraX* (Pettersen et al., 2021) followed by rigid-body  
665 fitting by subunit in *Phenix* 1.18.2-3874, and *Curlew* all-atom-refined using *Coot* 0.9.6.2. The  
666 *Dm2* model was manually inspected and new resolvable regions, less resolved regions, and/or  
667 conformationally different regions built or deleted manually in *Coot*, and locally refined in  
668 *ISOLDE* 1.4 (Croll, 2018). *Q*-scores were calculated using *MapQ*, and any outliers identified  
669 and corrected. Existing lipids were checked against their densities and deleted where  
670 appropriate; lipid tails were similarly clipped where necessary as described above. The model  
671 was then real-space refined against the *Dm2* map in *Phenix* 1.18.2-3874 with custom  
672 geometry restraints and secondary structure restraints (identified by *ksdssp*). Iteratively,  
673 rotameric and Ramachandran outliers were corrected manually in *Coot* and real-space refined  
674 in *Phenix*. The final real-space refinement for the *Dm2* model was performed without  
675 secondary structure restraints in *Phenix*. The model statistics for the active-state and *Dm2*  
676 classes (Table 1) were produced by *Phenix*, *MolProbity* (Chen et al., 2010), and *EMRinger*  
677 (Barad et al., 2015). Model-to-map FSC curves were generated using  
678 *phenix.validation\_cryoem* in *Phenix*.

679

680 Individual subunits from the *Dm2* model were rigid-body fitted into the *Dm3* map in *UCSF*  
681 *ChimeraX* (Pettersen et al., 2021) to generate a tentative model for the *Dm3* state for  
682 visualisation.

683

#### 684 **Cryo-EM model analyses**

685 RMSD calculations between models were performed using the *Align* command in *PyMOL*  
686 2.5.2 (Schrodinger LLC, 2022). Buried surface area between subunits were calculated using  
687 the *measure buriedarea* command in *UCSF ChimeraX* (Pettersen et al., 2021). The interior  
688 surface of the Q-binding channel and the intercalated phospholipid-filled cleft between

689 subunits ND6, ND3, ND1, and NDUFA9 were predicted using *CASTp* (Tian et al., 2018), which  
690 computes a protein surface topology from a PDB model. The default 1.4 Å radius probe was  
691 used and the results were visualised in *PyMOL* using the *CASTpyMOL 3.1* plugin and by  
692 *UCSF ChimeraX*.

693

#### 694 **Data availability**

695 Structural data have been deposited in the EMDB and PDB databases under the following  
696 accession codes: EMD-15936 and 8B9Z (*Dm1*; active), EMD-15937 and 8BA0 (*Dm2*; twisted),  
697 and EMD-15938 (*Dm3*; cracked).

698

#### 699 **Acknowledgements**

700 We thank D. Chirgadze (University of Cambridge Cryo-EM facility) for assistance with grid  
701 screening and cryo-EM data collection; T. Croll (Cambridge Institute for Medical Research)  
702 for assistance with ISOLDE and I. M. Fearnley and S. Ding (MRC MBU) for mass spectrometry  
703 analyses.

704

#### 705 **Funding**

706 This work was supported by the Medical Research Council (MC\_UU\_00015/6 and  
707 MC\_UU\_00028/6 to A.J.W. and MC\_UU\_00015/2 and MC\_UU\_00028/1 to J.H.). *Drosophila*  
708 were obtained from the Bloomington *Drosophila* Stock Center, which is supported by grant  
709 NIH P40OD018537.

710

#### 711 **Author contributions**

712

713 Ahmed-Noor Adam Agip: Conceptualisation, Methodology, Formal Analysis, Investigation,  
714 Data curation, Writing – review & editing.

715 Injae Chung: Validation, Formal analysis, Investigation, Data curation, Writing – original draft,  
716 Writing – review & editing, Visualisation.

717 Alvaro Sanchez-Martinez: Methodology, Investigation, Writing – review & editing.

718 Alexander J Whitworth: Conceptualisation, Writing – review & editing, Supervision, Project  
719 administration, Funding acquisition.

720 Judy Hirst: Conceptualisation, Formal analysis, Investigation, Writing – original draft, Writing  
721 – review & editing, Supervision, Project administration, Funding acquisition.

722

#### 723 **Author ORCIDs**

724 Ahmed-Noor Adam Agip <https://orcid.org/0000-0002-3020-8262>

725 Injae Chung <https://orcid.org/0000-0002-2902-4677>

726 Alvaro Sanchez-Martinez <https://orcid.org/0000-0002-2728-6251>

727 Alexander J Whitworth <https://orcid.org/0000-0002-1154-6629>

728 Judy Hirst <https://orcid.org/0000-0001-8667-6797>

729

730 **Competing interests**

731 The authors declare no competing interests.

732

## 733 References

734

- 735 Agip A-NA, Blaza JN, Bridges HR, Viscomi C, Rawson S, Muench SP, Hirst J. 2018. Cryo-  
736 EM structures of complex I from mouse heart mitochondria in two biochemically defined  
737 states. *Nat Struct Mol Biol* **25**:548–556. doi:10.1038/s41594-018-0073-1
- 738 Agip A-NA, Blaza JN, Fedor JG, Hirst J. 2019. Mammalian Respiratory Complex I Through  
739 the Lens of Cryo-EM. *Annu Rev Biophys* **48**:165–184. doi:10.1146/annurev-biophys-  
740 052118-115704
- 741 Babot M, Birch A, Labarbuta P, Galkin A. 2014. Characterisation of the active/de-active  
742 transition of mitochondrial complex I. *Biochim Biophys Acta - Bioenerg* **1837**:1083–  
743 1092. doi:10.1016/j.bbabi.2014.02.018
- 744 Barad BA, Echols N, Wang RY-R, Cheng Y, DiMaio F, Adams PD, Fraser JS. 2015.  
745 EMRinger: side chain-directed model and map validation for 3D cryo-electron  
746 microscopy. *Nat Methods* **12**:943–946. doi:10.1038/nmeth.3541
- 747 Baradaran R, Berrisford JM, Minhas GS, Sazanov LA. 2013. Crystal structure of the entire  
748 respiratory complex I. *Nature* **494**:443–448. doi:10.1038/nature11871
- 749 Birrell JA, Hirst J. 2010. Truncation of subunit ND2 disrupts the threefold symmetry of the  
750 antiporter-like subunits in complex I from higher metazoans. *FEBS Lett* **584**:4247–4252.  
751 doi:10.1016/j.febslet.2010.09.017
- 752 Blaza JN, Vinothkumar KR, Hirst J. 2018. Structure of the Deactive State of Mammalian  
753 Respiratory Complex I. *Structure* **26**:312–319. doi:10.1016/j.str.2017.12.014
- 754 Brown JB, Boley N, Eisman R, May GE, Stoiber MH, Duff MO, Booth BW, Wen J, Park S,  
755 Suzuki AM, Wan KH, Yu C, Zhang D, Carlson JW, Cherbas L, Eads BD, Miller D,  
756 Mockaitis K, Roberts J, Davis CA, Frise E, Hammonds AS, Olson S, Shenker S, Sturgill  
757 D, Samsonova AA, Weiszmann R, Robinson G, Hernandez J, Andrews J, Bickel PJ,  
758 Carninci P, Cherbas P, Gingeras TR, Hoskins RA, Kaufman TC, Lai EC, Oliver B,  
759 Perrimon N, Graveley BR, Celniker SE. 2014. Diversity and dynamics of the *Drosophila*  
760 transcriptome. *Nature* **512**:393–399. doi:10.1038/nature12962
- 761 Casañal A, Lohkamp B, Emsley P. 2020. Current developments in Coot for macromolecular  
762 model building of Electron Cryo-microscopy and Crystallographic Data. *Protein Sci*  
763 **29**:1055–1064. doi:10.1002/pro.3791
- 764 Chen VB, Arendall WB, Headd JJ, Keedy DA, Immormino RM, Kapral GJ, Murray LW,  
765 Richardson JS, Richardson DC. 2010. MolProbity: all-atom structure validation for  
766 macromolecular crystallography. *Acta Crystallogr Sect D Biol Crystallogr* **66**:12–21.  
767 doi:10.1107/S0907444909042073
- 768 Cho J, Hur JH, Graniel J, Benzer S, Walker DW. 2012. Expression of Yeast NDI1 Rescues a  
769 *Drosophila* Complex I Assembly Defect. *PLoS One* **7**:e50644.

- 770 doi:10.1371/journal.pone.0050644
- 771 Chouchani ET, Pell VR, Gaude E, Aksentijević D, Sundier SY, Robb EL, Logan A, Nadtochiy  
772 SM, Ord ENJ, Smith AC, Eyassu F, Shirley R, Hu C-H, Dare AJ, James AM, Rogatti S,  
773 Hartley RC, Eaton S, Costa ASH, Brookes PS, Davidson SM, Duchon MR, Saeb-Parsy  
774 K, Shattock MJ, Robinson AJ, Work LM, Frezza C, Krieg T, Murphy MP. 2014.  
775 Ischaemic accumulation of succinate controls reperfusion injury through mitochondrial  
776 ROS. *Nature* **515**:431–435. doi:10.1038/nature13909
- 777 Chouchani ET, Pell VR, James AM, Work LM, Saeb-Parsy K, Frezza C, Krieg T, Murphy  
778 MP. 2016. A Unifying Mechanism for Mitochondrial Superoxide Production during  
779 Ischemia-Reperfusion Injury. *Cell Metab* **23**:254–263. doi:10.1016/j.cmet.2015.12.009
- 780 Chung I, Grba DN, Wright JJ, Hirst J. 2022a. Making the leap from structure to mechanism:  
781 are the open states of mammalian complex I identified by cryoEM resting states or  
782 catalytic intermediates? *Curr Opin Struct Biol* **77**:102447.  
783 doi:10.1016/j.sbi.2022.102447
- 784 Chung I, Serreli R, Cross JB, Di Francesco ME, Marszalek JR, Hirst J. 2021. Cork-in-bottle  
785 mechanism of inhibitor binding to mammalian complex I. *Sci Adv* **7**:eabg4000.  
786 doi:10.1126/sciadv.abg4000
- 787 Chung I, Wright JJ, Bridges HR, Ivanov BS, Biner O, Pereira CS, Arantes GM, Hirst J.  
788 2022b. Cryo-EM structures define ubiquinone-10 binding to mitochondrial complex I  
789 and conformational transitions accompanying Q-site occupancy. *Nat Commun* **13**:2758.  
790 doi:10.1038/s41467-022-30506-1
- 791 Croll TI. 2018. ISOLDE: a physically realistic environment for model building into low-  
792 resolution electron-density maps. *Acta Crystallogr Sect D Struct Biol* **74**:519–530.  
793 doi:10.1107/S2059798318002425
- 794 Dröse S, Stepanova A, Galkin A. 2016. Ischemic A/D transition of mitochondrial complex I  
795 and its role in ROS generation. *Biochim Biophys Acta - Bioenerg* **1857**:946–957.  
796 doi:10.1016/j.bbabi.2015.12.013
- 797 Fassone E, Rahman S. 2012. Complex I deficiency: clinical features, biochemistry and  
798 molecular genetics. *J Med Genet* **49**:578–590. doi:10.1136/jmedgenet-2012-101159
- 799 Fiedorczuk K, Sazanov LA. 2018. Mammalian Mitochondrial Complex I Structure and  
800 Disease-Causing Mutations. *Trends Cell Biol* **28**:835–867.  
801 doi:10.1016/j.tcb.2018.06.006
- 802 Gabaldón T, Rainey D, Huynen MA. 2005. Tracing the Evolution of a Large Protein Complex  
803 in the Eukaryotes, NADH:Ubiquinone Oxidoreductase (Complex I). *J Mol Biol* **348**:857–  
804 870. doi:10.1016/j.jmb.2005.02.067
- 805 Galkin A, Meyer B, Wittig I, Karas M, Schagger H, Vinogradov A, Brandt U. 2008.  
806 Identification of the Mitochondrial ND3 Subunit as a Structural Component Involved in



- 807 the Active/Deactive Enzyme Transition of Respiratory Complex I. *J Biol Chem*  
808 **283**:20907–20913. doi:10.1074/jbc.M803190200
- 809 Galkin A, Moncada S. 2017. Modulation of the conformational state of mitochondrial  
810 complex I as a target for therapeutic intervention. *Interface Focus* **7**:20160104.  
811 doi:10.1098/rsfs.2016.0104
- 812 Garcia CJ, Khajeh J, Coulanges E, Chen El j., Owusu-Ansah E. 2017. Regulation of  
813 Mitochondrial Complex I Biogenesis in *Drosophila* Flight Muscles. *Cell Rep* **20**:264–  
814 278. doi:10.1016/j.celrep.2017.06.015
- 815 Grba DN, Hirst J. 2020. Mitochondrial complex I structure reveals ordered water molecules  
816 for catalysis and proton translocation. *Nat Struct Mol Biol* **27**:892–900.  
817 doi:10.1038/s41594-020-0473-x
- 818 Gu J, Liu T, Guo R, Zhang L, Yang M. 2022. The coupling mechanism of mammalian  
819 mitochondrial complex I. *Nat Struct Mol Biol* **370**. doi:10.1038/s41594-022-00722-w
- 820 Guerrero-Castillo S, Baertling F, Kownatzki D, Wessels HJ, Arnold S, Brandt U, Nijtmans L.  
821 2017. The Assembly Pathway of Mitochondrial Respiratory Chain Complex I. *Cell*  
822 *Metab* **25**:128–139. doi:10.1016/j.cmet.2016.09.002
- 823 Haddad GG. 2006. Tolerance to low O<sub>2</sub>: lessons from invertebrate genetic models. *Exp*  
824 *Physiol* **91**:277–282. doi:10.1113/expphysiol.2005.030767
- 825 Hirst J. 2013. Mitochondrial Complex I. *Annu Rev Biochem* **82**:551–575.  
826 doi:10.1146/annurev-biochem-070511-103700
- 827 Hirst J, Carroll J, Fearnley IM, Shannon RJ, Walker JE. 2003. The nuclear encoded subunits  
828 of complex I from bovine heart mitochondria. *Biochim Biophys Acta - Bioenerg*  
829 **1604**:135–150. doi:10.1016/S0005-2728(03)00059-8
- 830 Jarman OD, Biner O, Wright JJ, Hirst J. 2021. *Paracoccus denitrificans*: a genetically  
831 tractable model system for studying respiratory complex I. *Sci Rep* **11**:10143.  
832 doi:10.1038/s41598-021-89575-9
- 833 Jones AJY, Blaza JN, Varghese F, Hirst J. 2017. Respiratory Complex I in *Bos taurus* and  
834 *Paracoccus denitrificans* Pumps Four Protons across the Membrane for Every NADH  
835 Oxidized. *J Biol Chem* **292**:4987–4995. doi:10.1074/jbc.M116.771899
- 836 Jones HE, Harwood JL, Bowen ID, Griffiths G. 1992. Lipid composition of subcellular  
837 membranes from larvae and prepupae of *Drosophila melanogaster*. *Lipids* **27**:984–987.  
838 doi:10.1007/BF02535576
- 839 Kampjut D, Sazanov LA. 2022. Structure of respiratory complex I – An emerging blueprint  
840 for the mechanism. *Curr Opin Struct Biol* **74**:102350. doi:10.1016/j.sbi.2022.102350
- 841 Kampjut D, Sazanov LA. 2020. The coupling mechanism of mammalian respiratory complex  
842 I. *Science* **370**:eabc4209. doi:10.1126/science.abc4209
- 843 Klusch N, Senkler J, Yildiz Ö, Kühlbrandt W, Braun H-P. 2021. A ferredoxin bridge connects

- 844 the two arms of plant mitochondrial complex I. *Plant Cell* **33**:2072–2091.  
845 doi:10.1093/plcell/koab092
- 846 Kotlyar AB, Vinogradov AD. 1990. Slow active/inactive transition of the mitochondrial NADH-  
847 ubiquinone reductase. *Biochim Biophys Acta - Bioenerg* **1019**:151–158.  
848 doi:10.1016/0005-2728(90)90137-S
- 849 Kravchuk V, Petrova O, Kampjut D, Wojciechowska-Bason A, Breese Z, Sazanov L. 2022. A  
850 universal coupling mechanism of respiratory complex I. *Nature* **3**. doi:10.1038/s41586-  
851 022-05199-7
- 852 Leader DP, Krause SA, Pandit A, Davies SA, Dow JAT. 2018. FlyAtlas 2: a new version of  
853 the *Drosophila melanogaster* expression atlas with RNA-Seq, miRNA-Seq and sex-  
854 specific data. *Nucleic Acids Res* **46**:D809–D815. doi:10.1093/nar/gkx976
- 855 Letts JA, Fiedorczuk K, Degliesposti G, Skehel M, Sazanov LA. 2019. Structures of  
856 Respiratory Supercomplex I+III<sub>2</sub> Reveal Functional and Conformational Crosstalk. *Mol*  
857 *Cell* **75**:1131–1146. doi:10.1016/j.molcel.2019.07.022
- 858 Liebschner D, Afonine P V., Baker ML, Bunkóczi G, Chen VB, Croll TI, Hintze B, Hung L-W,  
859 Jain S, McCoy AJ, Moriarty NW, Oeffner RD, Poon BK, Prisant MG, Read RJ,  
860 Richardson JS, Richardson DC, Sammito MD, Sobolev O V, Stockwell DH, Terwilliger  
861 TC, Urzhumtsev AG, Videau LL, Williams CJ, Adams PD. 2019. Macromolecular  
862 structure determination using X-rays, neutrons and electrons: recent developments in  
863 Phenix. *Acta Crystallogr Sect D Struct Biol* **75**:861–877.  
864 doi:10.1107/S2059798319011471
- 865 Maklashina E, Kotlyar AB, Cecchini G. 2003. Active/de-active transition of respiratory  
866 complex I in bacteria, fungi, and animals. *Biochim Biophys Acta - Bioenerg* **1606**:95–  
867 103. doi:10.1016/S0005-2728(03)00087-2
- 868 Meyerson JR, Rao P, Kumar J, Chittori S, Banerjee S, Pierson J, Mayer ML, Subramaniam  
869 S. 2015. Self-assembled monolayers improve protein distribution on holey carbon cryo-  
870 EM supports. *Sci Rep* **4**:7084. doi:10.1038/srep07084
- 871 Milenkovic D, Blaza JN, Larsson N-G, Hirst J. 2017. The Enigma of the Respiratory Chain  
872 Supercomplex. *Cell Metab* **25**:765–776. doi:10.1016/j.cmet.2017.03.009
- 873 Molina-Granada D, González-Vioque E, Dibley MG, Cabrera-Pérez R, Vallbona-Garcia A,  
874 Torres-Torronteras J, Sazanov LA, Ryan MT, Cámara Y, Martí R. 2022. Most  
875 mitochondrial dGTP is tightly bound to respiratory complex I through the NDUFA10  
876 subunit. *Commun Biol* **5**:620. doi:10.1038/s42003-022-03568-6
- 877 Murari A, Rhooms S-K, Goparaju NS, Villanueva M, Owusu-Ansah E. 2020. An antibody  
878 toolbox to track complex I assembly defines AIF's mitochondrial function. *J Cell Biol*  
879 **219**. doi:10.1083/jcb.202001071
- 880 Padavannil A, Ayala-Hernandez MG, Castellanos-Silva EA, Letts JA. 2022. The Mysterious

- 881 Multitude: Structural Perspective on the Accessory Subunits of Respiratory Complex I.  
882 *Front Mol Biosci* **8**:1–33. doi:10.3389/fmolb.2021.798353
- 883 Parey K, Haapanen O, Sharma V, Köfeler H, Züllig T, Prinz S, Siegmund K, Wittig I, Mills  
884 DJ, Vonck J, Kühlbrandt W, Zickermann V. 2019. High-resolution cryo-EM structures of  
885 respiratory complex I: Mechanism, assembly, and disease. *Sci Adv* **5**:eaax9484.  
886 doi:10.1126/sciadv.aax9484
- 887 Parey K, Lasham J, Mills DJ, Djurabekova A, Haapanen O, Yoga EG, Xie H, Kühlbrandt W,  
888 Sharma V, Vonck J, Zickermann V. 2021. High-resolution structure and dynamics of  
889 mitochondrial complex I—Insights into the proton pumping mechanism. *Sci Adv*  
890 **7**:eabj3221. doi:10.1126/sciadv.abj3221
- 891 Parey K, Wirth C, Vonck J, Zickermann V. 2020. Respiratory complex I — structure,  
892 mechanism and evolution. *Curr Opin Struct Biol* **63**:1–9. doi:10.1016/j.sbi.2020.01.004
- 893 Perkins G, Hsiao Y, Yin S, Tjong J, Tran MT, Lau J, Xue J, Liu S, Ellisman MH, Zhou D.  
894 2012. Ultrastructural Modifications in the Mitochondria of Hypoxia-Adapted *Drosophila*  
895 *melanogaster*. *PLoS One* **7**:e45344. doi:10.1371/journal.pone.0045344
- 896 Pettersen EF, Goddard TD, Huang CC, Couch GS, Greenblatt DM, Meng EC, Ferrin TE.  
897 2004. UCSF Chimera—A visualization system for exploratory research and analysis. *J*  
898 *Comput Chem* **25**:1605–1612. doi:10.1002/jcc.20084
- 899 Pettersen EF, Goddard TD, Huang CC, Meng EC, Couch GS, Croll TI, Morris JH, Ferrin TE.  
900 2021. UCSF ChimeraX: Structure visualization for researchers, educators, and  
901 developers. *Protein Sci* **30**:70–82. doi:10.1002/pro.3943
- 902 Pintilie G, Zhang K, Su Z, Li S, Schmid MF, Chiu W. 2020. Measurement of atom  
903 resolvability in cryo-EM maps with Q-scores. *Nat Methods* **17**:328–334.  
904 doi:10.1038/s41592-020-0731-1
- 905 Pryde KR, Hirst J. 2011. Superoxide Is Produced by the Reduced Flavin in Mitochondrial  
906 Complex I. *J Biol Chem* **286**:18056–18065. doi:10.1074/jbc.M110.186841
- 907 Rhooms S-K, Murari A, Goparaju NSV, Vilanueva M, Owusu-Ansah E. 2020. Insights from  
908 *Drosophila* on mitochondrial complex I. *Cell Mol Life Sci* **77**:607–618.  
909 doi:10.1007/s00018-019-03293-0
- 910 Rohou A, Grigorieff N. 2015. CTFFIND4: Fast and accurate defocus estimation from  
911 electron micrographs. *J Struct Biol* **192**:216–221. doi:10.1016/j.jsb.2015.08.008
- 912 Röpke M, Riepl D, Saura P, Di Luca A, Mühlbauer ME, Jussupow A, Gamiz-Hernandez AP,  
913 Kaila VRI. 2021. Deactivation blocks proton pathways in the mitochondrial complex I.  
914 *Proc Natl Acad Sci* **118**:e2019498118. doi:10.1073/pnas.2019498118
- 915 Rosenthal PB, Henderson R. 2003. Optimal Determination of Particle Orientation, Absolute  
916 Hand, and Contrast Loss in Single-particle Electron Cryomicroscopy. *J Mol Biol*  
917 **333**:721–745. doi:10.1016/j.jmb.2003.07.013

- 918 Russo CJ, Passmore LA. 2014. Ultrastable gold substrates for electron cryomicroscopy.  
919 *Science* **346**:1377–1380. doi:10.1126/science.1259530
- 920 Schrodinger LLC. 2022. The PyMOL Molecular Graphics System, Version 2.5.2.
- 921 Schuller JM, Birrell JA, Tanaka H, Konuma T, Wulfhorst H, Cox N, Schuller SK, Thiemann J,  
922 Lubitz W, Sétif P, Ikegami T, Engel BD, Kurisu G, Nowaczyk MM. 2019. Structural  
923 adaptations of photosynthetic complex I enable ferredoxin-dependent electron transfer.  
924 *Science* **363**:257–260. doi:10.1126/science.aau3613
- 925 Scialò F, Sriram A, Fernández-Ayala D, Gubina N, Löhmus M, Nelson G, Logan A, Cooper  
926 HM, Navas P, Enríquez JA, Murphy MP, Sanz A. 2016. Mitochondrial ROS Produced  
927 via Reverse Electron Transport Extend Animal Lifespan. *Cell Metab* **23**:725–734.  
928 doi:10.1016/j.cmet.2016.03.009
- 929 Scialò F, Sriram A, Stefanatos R, Spriggs R V., Loh SHY, Martins LM, Sanz A. 2020.  
930 Mitochondrial complex I derived ROS regulate stress adaptation in *Drosophila*  
931 *melanogaster*. *Redox Biol* **32**:101450. doi:10.1016/j.redox.2020.101450
- 932 Shimada S, Oosaki M, Takahashi R, Uene S, Yanagisawa S, Tsukihara T, Shinzawa-Itoh K.  
933 2018. A unique respiratory adaptation in *Drosophila* independent of supercomplex  
934 formation. *Biochim Biophys Acta - Bioenerg* **1859**:154–163.  
935 doi:10.1016/j.bbabi.2017.11.007
- 936 Sievers F, Wilm A, Dineen D, Gibson TJ, Karplus K, Li W, Lopez R, McWilliam H, Remmert  
937 M, Söding J, Thompson JD, Higgins DG. 2011. Fast, scalable generation of high-quality  
938 protein multiple sequence alignments using Clustal Omega. *Mol Syst Biol* **7**:539.  
939 doi:10.1038/msb.2011.75
- 940 Soufari H, Parrot C, Kuhn L, Waltz F, Hashem Y. 2020. Specific features and assembly of  
941 the plant mitochondrial complex I revealed by cryo-EM. *Nat Commun* **11**:5195.  
942 doi:10.1038/s41467-020-18814-w
- 943 Spikes TE, Montgomery MG, Walker JE. 2020. Structure of the dimeric ATP synthase from  
944 bovine mitochondria. *Proc Natl Acad Sci* **117**:23519–23526.  
945 doi:10.1073/pnas.2013998117
- 946 Stewart JB, Beckenbach AT. 2009. Characterization of mature mitochondrial transcripts in  
947 *Drosophila*, and the implications for the tRNA punctuation model in arthropods. *Gene*  
948 **445**:49–57. doi:10.1016/j.gene.2009.06.006
- 949 Stroud DA, Surgenor EE, Formosa LE, Reljic B, Frazier AE, Dibley MG, Osellame LD, Stait  
950 T, Beilharz TH, Thorburn DR, Salim A, Ryan MT. 2016. Accessory subunits are integral  
951 for assembly and function of human mitochondrial complex I. *Nature* **538**:123–126.  
952 doi:10.1038/nature19754
- 953 Tan YZ, Baldwin PR, Davis JH, Williamson JR, Potter CS, Carragher B, Lyumkis D. 2017.  
954 Addressing preferred specimen orientation in single-particle cryo-EM through tilting. *Nat*

- 955 *Methods* **14**:793–796. doi:10.1038/nmeth.4347
- 956 Teixeira MH, Arantes GM. 2019. Balanced internal hydration discriminates substrate binding  
957 to respiratory complex I. *Biochim Biophys Acta - Bioenerg* **1860**:541–548.  
958 doi:10.1016/j.bbabi.2019.05.004
- 959 Tian W, Chen C, Lei X, Zhao J, Liang J. 2018. CASTp 3.0: computed atlas of surface  
960 topography of proteins. *Nucleic Acids Res* **46**:W363–W367. doi:10.1093/nar/gky473
- 961 Tocilescu MA, Fendel U, Zwicker K, Dröse S, Kerscher S, Brandt U. 2010. The role of a  
962 conserved tyrosine in the 49-kDa subunit of complex I for ubiquinone binding and  
963 reduction. *Biochim Biophys Acta - Bioenerg* **1797**:625–632.  
964 doi:10.1016/j.bbabi.2010.01.029
- 965 Vinogradov AD. 1998. Catalytic properties of the mitochondrial NADH–ubiquinone  
966 oxidoreductase (Complex I) and the pseudo-reversible active/inactive enzyme  
967 transition. *Biochim Biophys Acta - Bioenerg* **1364**:169–185. doi:10.1016/S0005-  
968 2728(98)00026-7
- 969 Wagner T, Merino F, Stabrin M, Moriya T, Antoni C, Apelbaum A, Hagel P, Sitsel O, Raisch  
970 T, Prumbaum D, Quentin D, Roderer D, Tacke S, Siebolds B, Schubert E, Shaikh TR,  
971 Lill P, Gatsogiannis C, Raunser S. 2019. SPHIRE-crYOLO is a fast and accurate fully  
972 automated particle picker for cryo-EM. *Commun Biol* **2**:218. doi:10.1038/s42003-019-  
973 0437-z
- 974 Warnau J, Sharma V, Gamiz-Hernandez AP, Di Luca A, Haapanen O, Vattulainen I,  
975 Wikström M, Hummer G, Kaila VRI. 2018. Redox-coupled quinone dynamics in the  
976 respiratory complex I. *Proc Natl Acad Sci* **115**:E8413–E8420.  
977 doi:10.1073/pnas.1805468115
- 978 Waterhouse A, Bertoni M, Bienert S, Studer G, Tauriello G, Gumienny R, Heer FT, de Beer  
979 TAP, Rempfer C, Bordoli L, Lepore R, Schwede T. 2018. SWISS-MODEL: homology  
980 modelling of protein structures and complexes. *Nucleic Acids Res* **46**:W296–W303.  
981 doi:10.1093/nar/gky427
- 982 Webb B, Sali A. 2016. Comparative Protein Structure Modeling Using MODELLER. *Curr*  
983 *Protoc Bioinforma* **54**:5.6.1-5.6.37. doi:10.1002/cpbi.3
- 984 Wright JJ, Biner O, Chung I, Burger N, Bridges HR, Hirst J. 2022. Reverse Electron Transfer  
985 by Respiratory Complex I Catalyzed in a Modular Proteoliposome System. *J Am Chem*  
986 *Soc* **144**:6791–6801. doi:10.1021/jacs.2c00274
- 987 Yin Z, Burger N, Kula-Alwar D, Aksentijević D, Bridges HR, Prag HA, Grba DN, Viscomi C,  
988 James AM, Mottahedin A, Krieg T, Murphy MP, Hirst J. 2021. Structural basis for a  
989 complex I mutation that blocks pathological ROS production. *Nat Commun* **12**:707.  
990 doi:10.1038/s41467-021-20942-w
- 991 Zheng SQ, Palovcak E, Armache J-P, Verba KA, Cheng Y, Agard DA. 2017. MotionCor2:

- 992 anisotropic correction of beam-induced motion for improved cryo-electron microscopy.  
993 *Nat Methods* **14**:331–332. doi:10.1038/nmeth.4193
- 994 Zhou D, Haddad GG. 2013. Genetic Analysis of Hypoxia Tolerance and Susceptibility in  
995 *Drosophila* and Humans. *Annu Rev Genomics Hum Genet* **14**:25–43.  
996 doi:10.1146/annurev-genom-091212-153439
- 997 Zhou L, Maldonado M, Padavannil A, Guo F, Letts JA. 2022. Structures of *Tetrahymena*'s  
998 respiratory chain reveal the diversity of eukaryotic core metabolism. *Science* **7747**:1–  
999 16. doi:10.1126/science.abn7747
- 1000 Zhu J, King MS, Yu M, Klipcan L, Leslie AGW, Hirst J. 2015. Structure of subcomplex I $\beta$  of  
1001 mammalian respiratory complex I leads to new supernumerary subunit assignments.  
1002 *Proc Natl Acad Sci* **112**:12087–12092. doi:10.1073/pnas.1510577112
- 1003 Zhu J, Vinothkumar KR, Hirst J. 2016. Structure of mammalian respiratory complex I. *Nature*  
1004 **536**:354–358. doi:10.1038/nature19095
- 1005 Zivanov J, Nakane T, Forsberg BO, Kimanius D, Hagen WJ, Lindahl E, Scheres SH. 2018.  
1006 New tools for automated high-resolution cryo-EM structure determination in RELION-3.  
1007 *Elife* **7**:e42166. doi:10.7554/eLife.42166
- 1008 Zivanov J, Nakane T, Scheres SHW. 2020. Estimation of high-order aberrations and  
1009 anisotropic magnification from cryo-EM data sets in RELION-3.1. *IUCrJ* **7**:253–267.  
1010 doi:10.1107/S2052252520000081
- 1011 Zivanov J, Nakane T, Scheres SHW. 2019. A Bayesian approach to beam-induced motion  
1012 correction in cryo-EM single-particle analysis. *IUCrJ* **6**:5–17.  
1013 doi:10.1107/S205225251801463X  
1014

1015 **Figure 1**

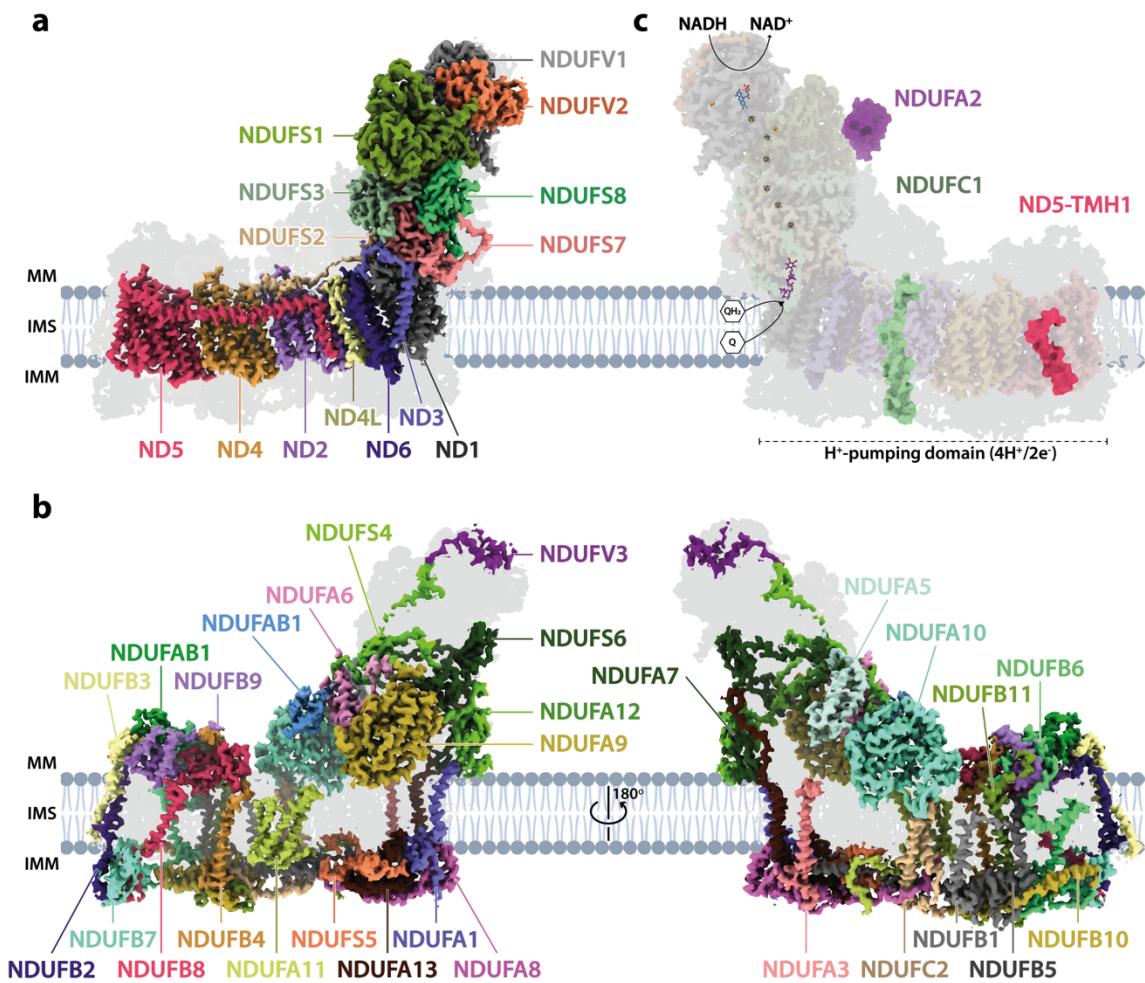

1016

1017

1018 **The architecture of complex I from *Drosophila melanogaster*.** **A)** The 14 core subunits  
 1019 are shown in colour and labelled accordingly, and the 29 supernumerary subunits are shaded  
 1020 in grey. **b)** The 29 supernumerary subunits are shown in colour and labelled accordingly, and  
 1021 the 14 core subunits are shaded in grey. **c)** *Drosophila* complex I shown in transparent colour  
 1022 (as in **a**) with NDUFA2 (purple), NDUFC1 (green), and ND5-TMH1 (red), which are absent in  
 1023 *Drosophila* but present in mammalian complex I, indicated in solid colour from the structure of  
 1024 bovine complex I (PDB ID: 7QSK) (Chung et al., 2022b). The NADH-binding site at the flavin  
 1025 mononucleotide (FMN) cofactor, iron-sulphur clusters, the Q-binding site (Q<sub>9</sub>; purple), and the  
 1026 proton-pumping domain are indicated. All structures are of the *Dm1* active-state *Drosophila*  
 1027 cryo-EM map, shown at a map threshold of 0.013 in UCSF ChimeraX (Pettersen et al., 2021).  
 1028 Abbreviations: MM, mitochondrial matrix; IMS, intermembrane space; IMM, inner  
 1029 mitochondrial membrane; TMH, transmembrane helix.

1030

1031 The following figure supplements are available for Figure 1:

1032 **Figure 1 – Figure Supplement 1.** Example of a preparation of *Drosophila* complex I.

- 1033 **Figure 1 – Figure Supplement 2.** Cryo-EM data processing and particle classification.
- 1034 **Figure 1 – Figure Supplement 3.** Local resolution maps, Mollweide projections, 3DFSC plots,  
1035 and Fourier shell correlation curves for three states of *Drosophila* complex I.
- 1036 **Figure 1 – Figure Supplement 4.** Cryo-EM densities and models for ligands and  
1037 phospholipids observed in *Drosophila* complex I.
- 1038 **Figure 1 – Figure Supplement 5.** Cryo-EM densities and models for *Drosophila*-specific  
1039 subunit extensions and conformations.
- 1040 **Figure 1 – Figure Supplement 6.** Cryo-EM density and model for subunit NDUFA3 in  
1041 *Drosophila* complex I.
- 1042



1043 **Figure 2**

1044

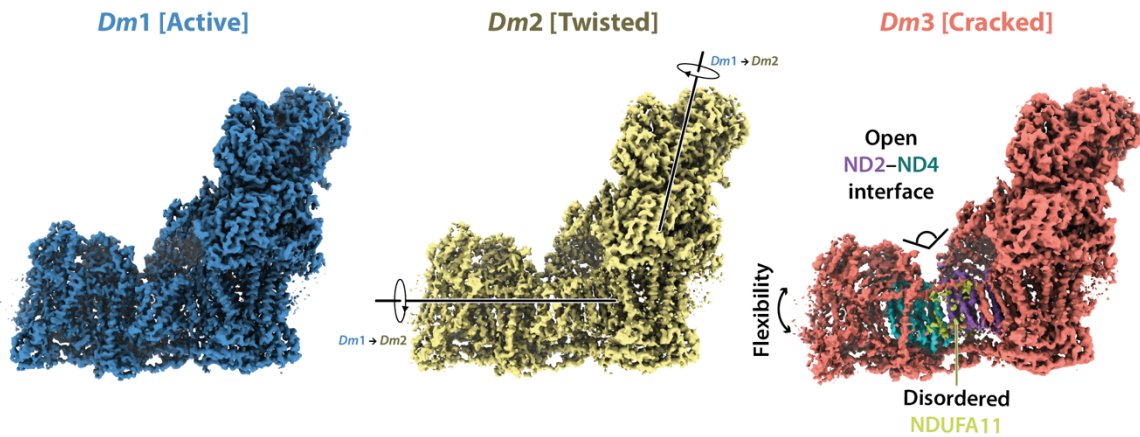

1045

1046

1047

1048

1049

1050

1051

1052

1053

1054

1055

1056

1057

1058

1059

1060

**Global comparison between the three states of *Drosophila* complex I.** Side views of the three *Drosophila* complex I cryo-EM maps identified by 3D classification are shown with global motions between the three states indicated. States *Dm1* and *Dm2* are related by a twisting motion of the hydrophilic and membrane domains about the ND1-containing 'heel' subdomain. States *Dm2* and *Dm3* are related by 'cracking' open of the ND2-ND4 interface in *Dm3*. Cryo-EM densities are shown at map thresholds of 0.013 (*Dm1*), 0.014 (*Dm2*), and 0.015 (*Dm3*) in *UCSF ChimeraX* (Pettersen et al., 2021).

The following figure supplements are available for Figure 2:

**Figure 2 – Figure Supplement 1.** The NEM assay does not reveal a mammalian-type deactive state for *Drosophila* complex I.

**Figure 2 – Figure Supplement 2.** Structural features of the *Dm3* state of *Drosophila* complex I.

1061 **Figure 3**

1062

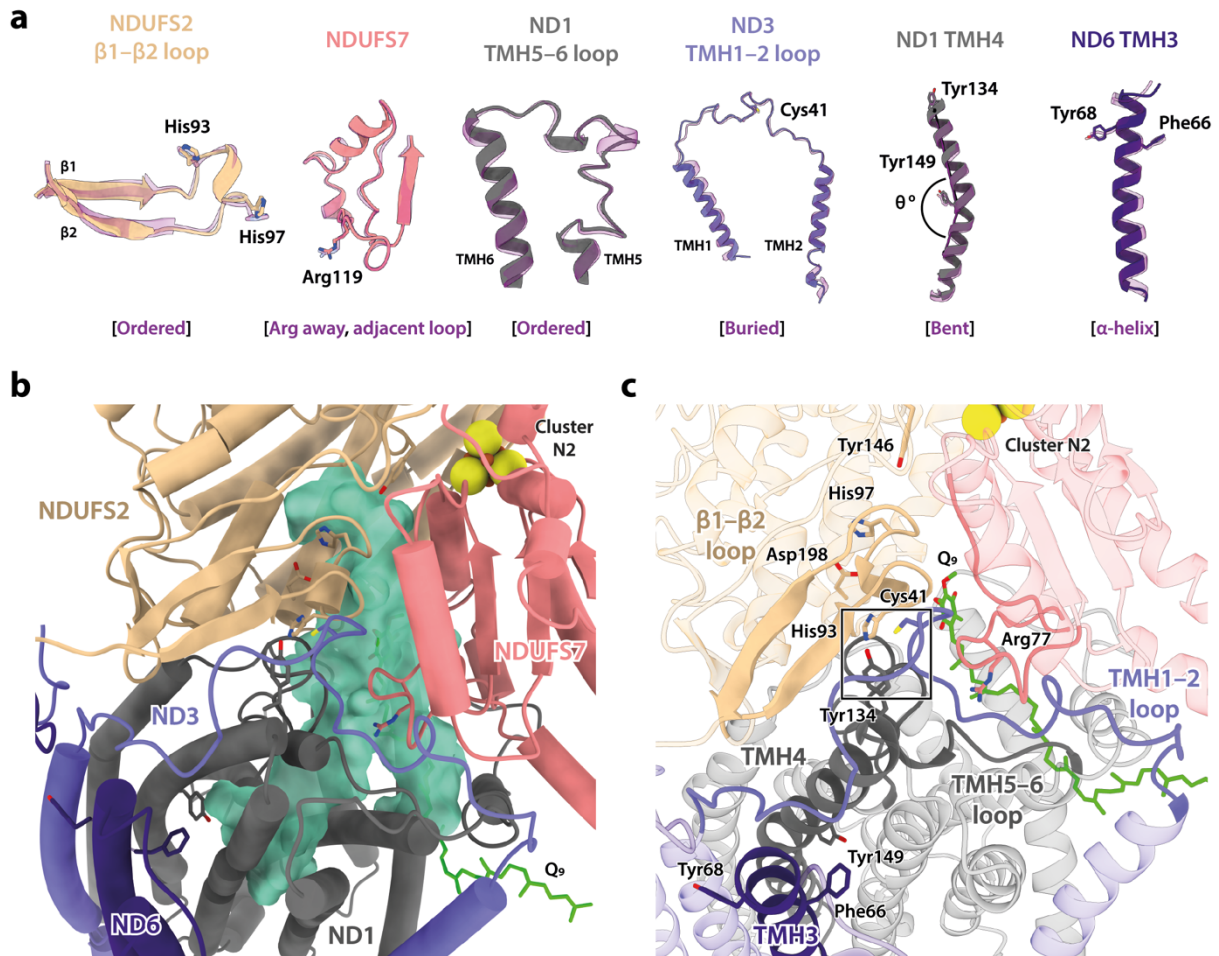

1063

1064

1065 **Local structural elements show that *Dm1* is the active resting state of *Drosophila***

1066 **complex I. a)** The local elements in the core subunits that show the *Dm1* complex is in the

1067 active state are individually compared against an active-state bovine structure (transparent

1068 purple; PDB ID: 7QSK) (Chung et al., 2022b). Active state-specific key local features are

1069 indicated in square brackets. The same features are highlighted and labelled in **b** and **c**,

1070 respectively, showing that subunits NDUFS2, NDUFS7, ND1, ND3, and ND6 encapsulate a

1071 fully structured and sealed Q-binding cavity (aquamarine surface; detected by *CASTp* (Tian

1072 et al., 2018)) with a Q<sub>9</sub> molecule bound. The Coulomb potential density for Q<sub>9</sub> is shown in

1073 Figure 1 – Figure Supplement 4. The box in **c** denotes the trigonal junction (ND3-Cys41,

1074 NDUFS2-His93 and ND1-Tyr134).

1075

1076 The following figure supplement is available for Figure 3:

1077 **Figure 3 – Figure Supplement 1.** Comparison of the position of the bound ubiquinone in the

1078 *Dm1* state with the positions of ubiquinone molecules bound in other structures.

1079 **Figure 4**

1080

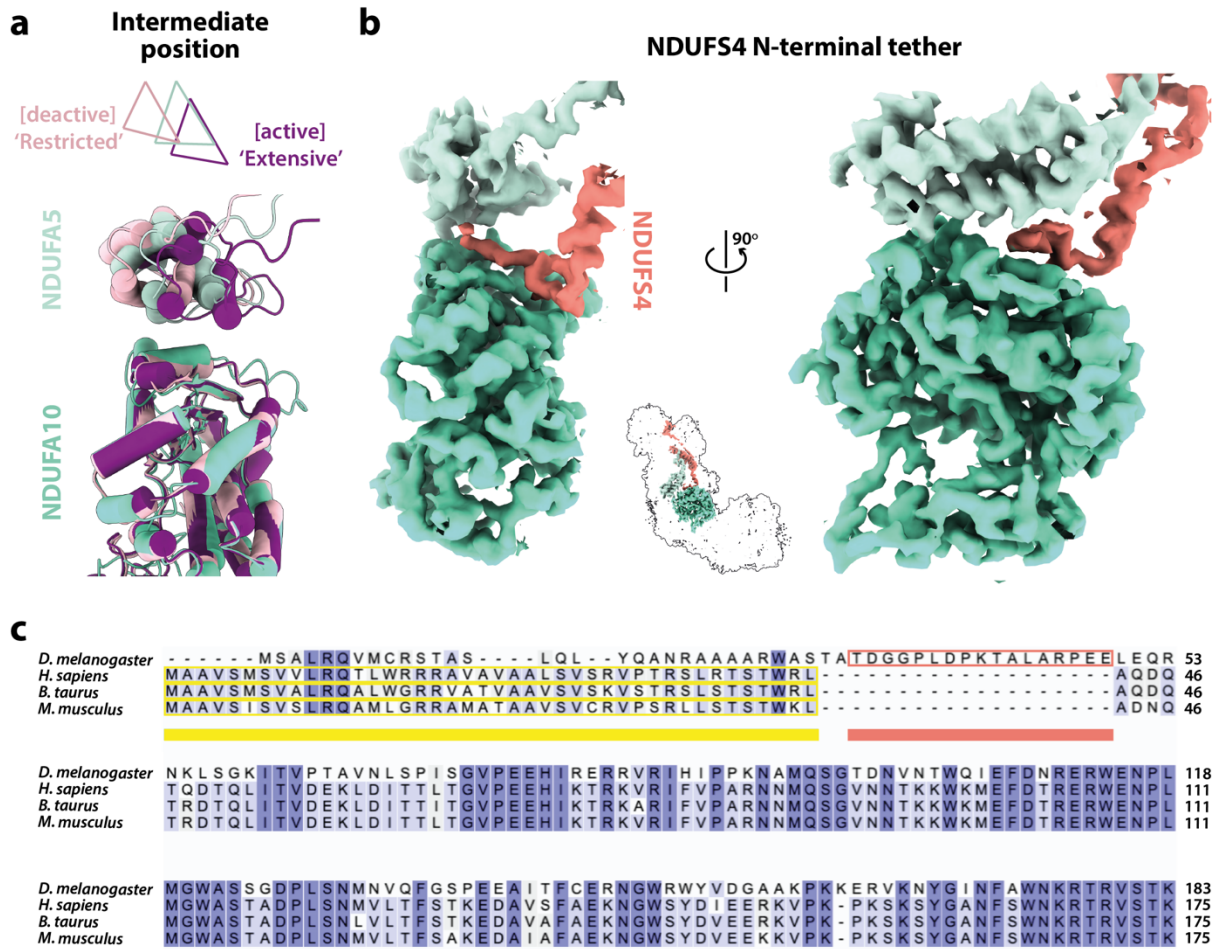

1081

1082

1083 **The domain interface between subunits NDUFA5, NDUFA10, and NDUFS4 in *Drosophila***

1084 **complex I. a)** The interface between subunits NDUFA5 (mint) and NDUFA10 (turquoise) of

1085 *Drosophila* complex I is compared against the active (purple; PDB ID: 7QSK) and deactive

1086 (light pink; PDB ID: 7QSM) states of bovine complex I (Chung et al., 2022b), displaying an

1087 'intermediate' conformation. Triangles indicate positions of the three-helix bundles in

1088 NDUFA5. The structures are aligned to subunit NDUFA10. **B)** The extended N-terminal loop

1089 of NDUFS4 (salmon) specific to *Drosophila* complex I is tethered between NDUFA5 and

1090 NDUFA10, locking them in place. Inset shows the positions of the three subunits in complex

1091 I. The active-state (*Dm1*) *Drosophila* complex I map is shown at a threshold of 0.013 in *UCSF*

1092 *ChimeraX* (Pettersen et al., 2021). **C)** Sequence alignment of NDUFS4 across a selection of

1093 NDUFA5/NDUFA10-containing organisms. Residues are coloured by similarity. Known

1094 mitochondrial targeting sequences are highlighted in yellow, and the modelled N-terminal

1095 extension of NDUFS4 in the *Dm1* active-state structure is highlighted in salmon. UniProt IDs

1096 used for the alignment in *Clustal Omega 1.2.4* (Sievers et al., 2011): *Drosophila melanogaster*,

1097 Q9VWI0, *Homo sapiens*, O43181, *Bos taurus*, Q02375, *Mus musculus*, Q9CXZ1.

1098 **Figure 5**

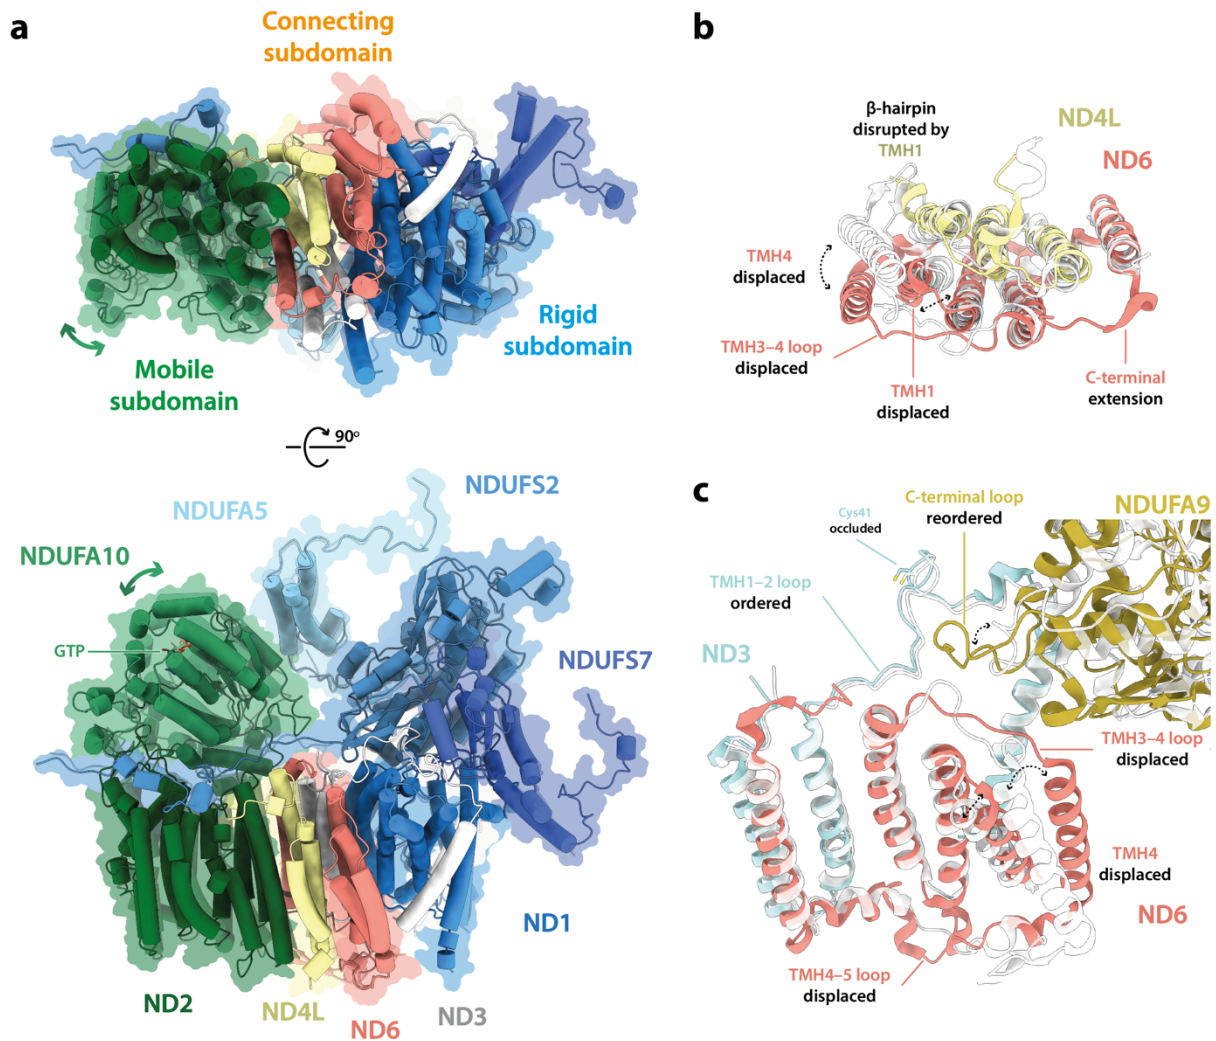

1099

1100 **The structure of subunit ND6 and the connecting subdomain between subunits ND1**

1101 **and ND2 alters the relative domain dispositions in the *Drosophila* active state relative**

1102 **to the mammalian active state. A)** The structures of subunits NDUFS2, NDUFS7, NDUFA5,

1103 and ND1 are tightly conserved between the *Drosophila* (*Dm1*, solid cartoon) and mammalian

1104 (PDB ID: 7QSK (Chung et al., 2022b), transparent cartoon) active states, forming a rigid

1105 subdomain. Subunits ND3, ND6, and ND4L form a connecting subdomain that differs, shifting

1106 the position and orientation of the mobile subdomain containing subunits ND2 and NDUFA10.

1107 The altered connecting domain changes the domain interface between NDUFA5 and

1108 NDUFA10. The models for the *Drosophila* and mammalian complexes are aligned on subunit

1109 NDUFS2 and shown alongside a flat surface representation of the *Drosophila* model. **B-c)**

1110 Changes to the structure of the ND6 subunit, plus structural changes in adjacent subunits.

1111 The models for the *Drosophila* (*Dm1*, coloured) and mammalian (PDB ID: 7QSK (Chung et

1112 al., 2022b), white) active states are overlaid on subunit ND6.

1113

1114 The following figure supplement is available for Figure 5:

1115 **Figure 5 – Figure Supplement 1.** Comparison of the position of ND6-TMH4 in the *Dm1* state  
1116 with the positions of ND6-TMH4 in other structures.

1117

1118 **Figure 6**  
1119

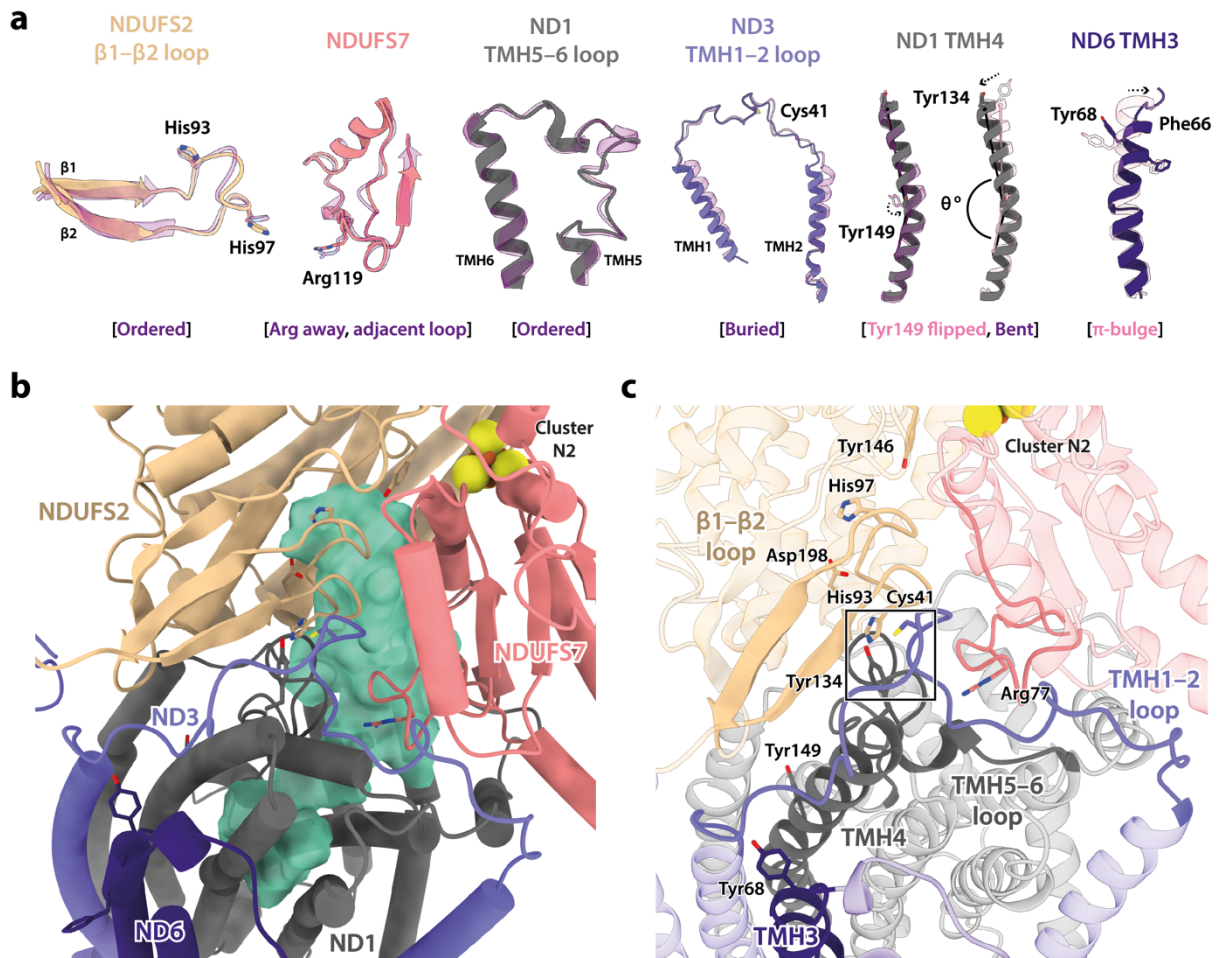

1120  
1121

1122 **Local structural elements show that the *Dm2* state of *Drosophila* complex I most closely**  
1123 **resembles the mammalian active state, with only two deactive-like features in the**  
1124 **membrane domain. A)** The local elements in the core subunits, individually compared against  
1125 an active-state bovine structure (transparent purple; PDB ID: 7QSK) (Chung et al., 2022b),  
1126 show that all Q-site features of the *Dm2* complex are in the active state, whereas in the  
1127 membrane domain Tyr149-ND1 and ND6-TMH3 match the bovine deactive state (transparent  
1128 pink; PDB ID: 7QSM) (Chung et al., 2022b). Active state-specific key local features are  
1129 indicated in square brackets in purple and deactive state-specific features in pink. The same  
1130 features are highlighted and labelled in **b** and **c**, respectively, showing that subunits NDUFS2,  
1131 NDUFS7, ND1, ND3, and ND6 encapsulate a fully structured and sealed Q-binding cavity  
1132 (aquamarine surface; detected by CASTp (Tian et al., 2018)). The box in **c** denotes the trigonal  
1133 junction (ND3-Cys41, NDUFS2-His93 and ND1-Tyr134).

1134

1135 The following figure supplement is available for Figure 6.

1136 **Figure Supplement 1.** Local structural elements in the *Dm2* state are conserved in *Dm3*.

1137 **Figure 7**  
1138

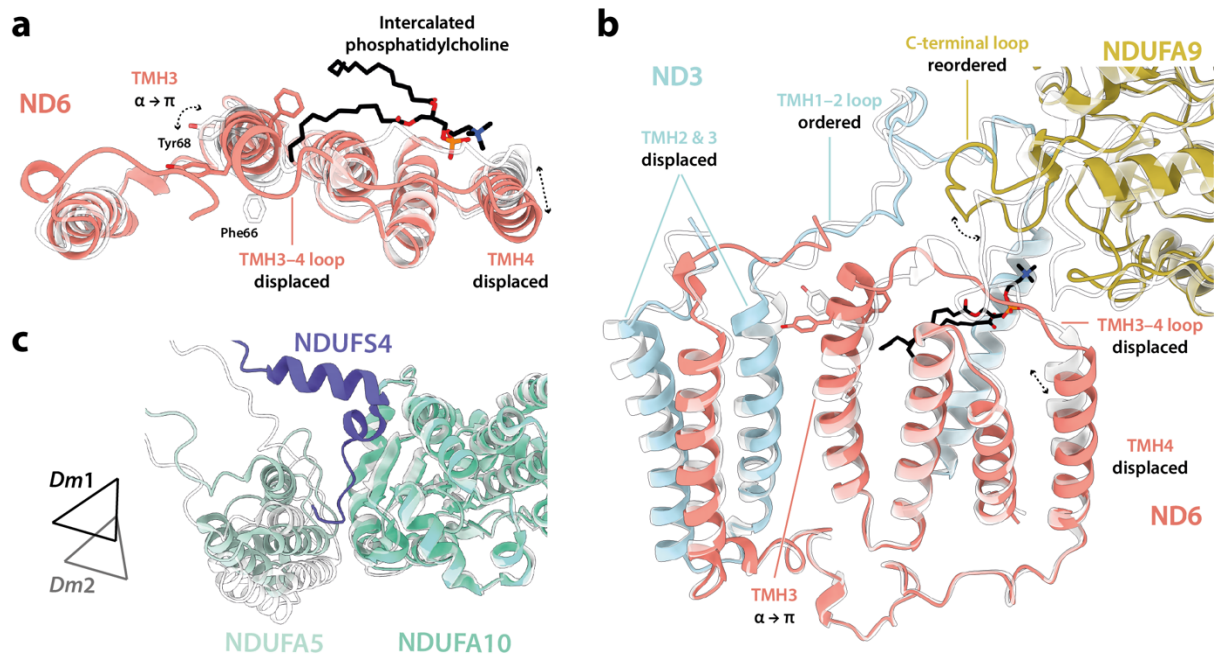

1139  
1140

1141 **Differences between the *Dm1* and *Dm2* states at the connecting subdomain and at the**  
1142 **domain interface between subunits NDUFA5, NDUFA10, and NDUFS4. A-b)** Changes to  
1143 the structure of the ND6 subunit, plus structural changes in adjacent subunits. The intercalated  
1144 phosphatidylcholine molecule is present in the *Dm1* state only. **C)** The interface between  
1145 subunits NDUFA5 (mint), NDUFA10 (turquoise), and NDUFS4 (slate) of the *Dm1* state is  
1146 compared against *Dm2* (white). Triangles indicate positions of the three-helix bundles in  
1147 NDUFA5. The N-terminal NDUFS4 tether occupies the interface in *Dm1* only, and the  
1148 NDUFA5/NDUFA10 interface area is decreased in *Dm2*. The models for the *Dm1* (coloured)  
1149 and *Dm2* (white) states are overlaid on subunit ND6 in **a** and **b**, and on subunit NDUFA10 in  
1150 **c**.

1151

1152 **Figure 8**

1153

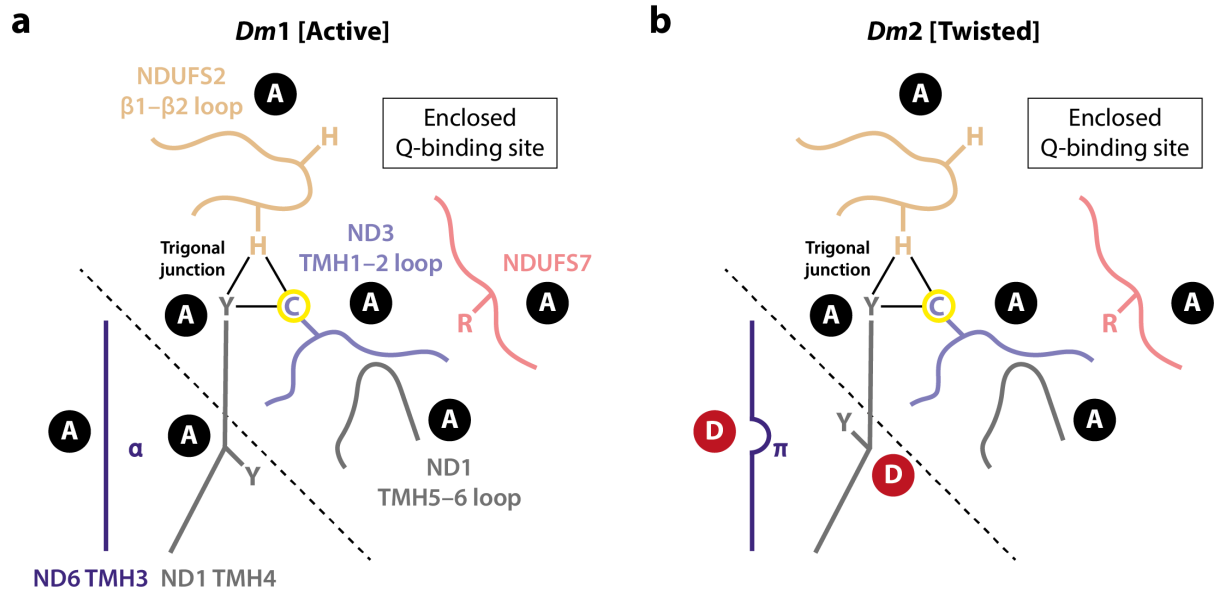

1154

1155

1156 **Schematic representation of the status of local active-deactive elements in the *Dm1***

1157 **and *Dm2* states of *Drosophila* complex I.** Local elements that change conformation in the

1158 mammalian active/deactive transition are shown and labelled as A for active and D for

1159 deactive, respectively. In the *Dm2* state, ND6-TMH3 and ND1-TMH4-Tyr149 are in the D

1160 conformation. The boundary of the A and D regions is marked with a dashed line. In the

1161 mammalian deactive state, the top section of ND1-TMH4 moves, straightening the helix and

1162 resulting in loss of the trigonal junction (ND3-Cys41, NDUFS2-His93 and ND1-Tyr134),

1163 destructuring of the NDUFS2, ND3 and ND1 loops and restructuring of the NDUFS7 loop and

1164 NDUFS7-Arg119. ND3-Cys41, the derivatisable marker of the deactive state in

1165 mammalian/eukaryotic complex I (Galkin et al., 2008), is indicated with a yellow circle.

1166



1167 **Table 1: Cryo-EM data collection, refinement and validation statistics for the three**  
 1168 **states of *Drosophila* complex I.**

| <i>Drosophila melanogaster</i> complex I dataset    |                     |                      |                      |
|-----------------------------------------------------|---------------------|----------------------|----------------------|
| <b>Data Collection and Processing</b>               |                     |                      |                      |
| Magnification                                       |                     | 130,000              |                      |
| Voltage (kV)                                        |                     | 300                  |                      |
| Electron exposure (e <sup>-</sup> /Å <sup>2</sup> ) |                     | 42                   |                      |
| Defocus range (μm)                                  |                     | -1.0 to -2.0         |                      |
| Nominal pixel size (Å)                              |                     | 1.07                 |                      |
| Calibrated pixel size (Å)                           |                     | 1.048                |                      |
| Symmetry imposed                                    |                     | C1                   |                      |
| Initial particle images (no.)                       |                     | 194,538              |                      |
| Final particle images (no.)                         |                     | 63,471               |                      |
| <b>Classes</b>                                      | <b>Dm1 [Active]</b> | <b>Dm2 [Twisted]</b> | <b>Dm3 [Cracked]</b> |
|                                                     | EMD-15936           | EMD-15937            | EMD-15938            |
|                                                     | PDB-8B9Z            | PDB-8BA0             |                      |
| Final particle images (no.)                         | 37,608              | 12,343               | 13,520               |
| Map resolution (Å)                                  | 3.28                | 3.68                 | 3.96                 |
| FSC threshold: 0.143                                |                     |                      |                      |
| Map resolution range (Å)                            | 2.98–6.19           | 3.33–9.40            | 3.51–11.35           |
| Map sharpening <i>B</i> -factor (Å <sup>2</sup> )   | 0                   | 15                   | 20                   |
| <b>Model Statistics</b>                             |                     |                      |                      |
| Initial model (PDB ID)                              | 6G2J                | 6G2J                 |                      |
| Model resolution (Å)                                | 3.41                | 3.92                 |                      |
| FSC threshold: 0.5                                  |                     |                      |                      |
| Model composition                                   |                     |                      |                      |
| Non-hydrogen atoms                                  | 66,970              | 65,912               |                      |
| Protein residues                                    | 8,178               | 8,136                |                      |
| Ligands                                             | 39                  | 22                   |                      |
| Average <i>B</i> -factors (Å <sup>2</sup> )         |                     |                      |                      |
| Protein                                             | 99                  | 110                  |                      |
| Ligand                                              | 103                 | 115                  |                      |
| Root Mean Square Deviations                         |                     |                      |                      |
| Bond lengths (Å)                                    | 0.006               | 0.007                |                      |
| Bond angles (°)                                     | 0.726               | 0.783                |                      |
| MolProbity score                                    | 1.60                | 2.04                 |                      |
| All-atom clash score                                | 6.24                | 10.90                |                      |
| EMRinger score                                      | 3.18                | 1.68                 |                      |
| Rotamer outliers (%)                                | 0.00                | 0.00                 |                      |
| Ramachandran plot                                   |                     |                      |                      |
| Favoured (%)                                        | 96.18               | 91.97                |                      |
| Allowed (%)                                         | 3.80                | 8.01                 |                      |
| Outliers (%)                                        | 0.02                | 0.02                 |                      |

1169

1170 **Figure 1 – Figure Supplement 1**

1171

**a Anion-exchange chromatography**

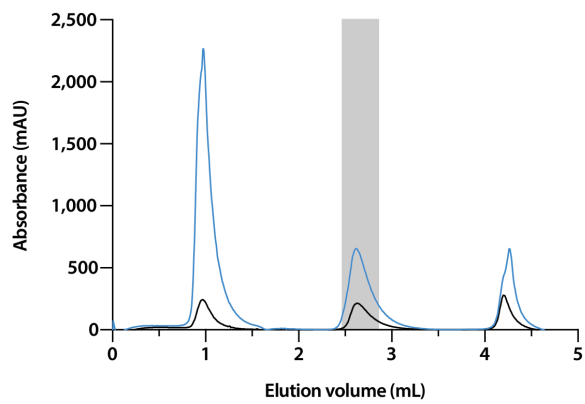

**b Gel filtration**

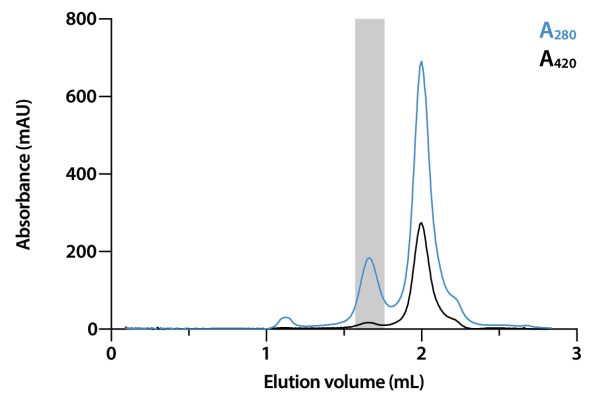

1172

1173

1174 **Example of a preparation of *Drosophila* complex I.** Elution of complex I-containing fractions  
1175 (shaded in grey) from (a) a 1 mL Hi-Trap Q HP anion-exchange column followed by (b) a  
1176 Superose 6 increase 5/150 size-exclusion column (see Methods for details). Blue and black  
1177 lines indicate absorbance at 280 and 420 nm, respectively.

1178 **Figure 1 – Figure Supplement 2**

1179

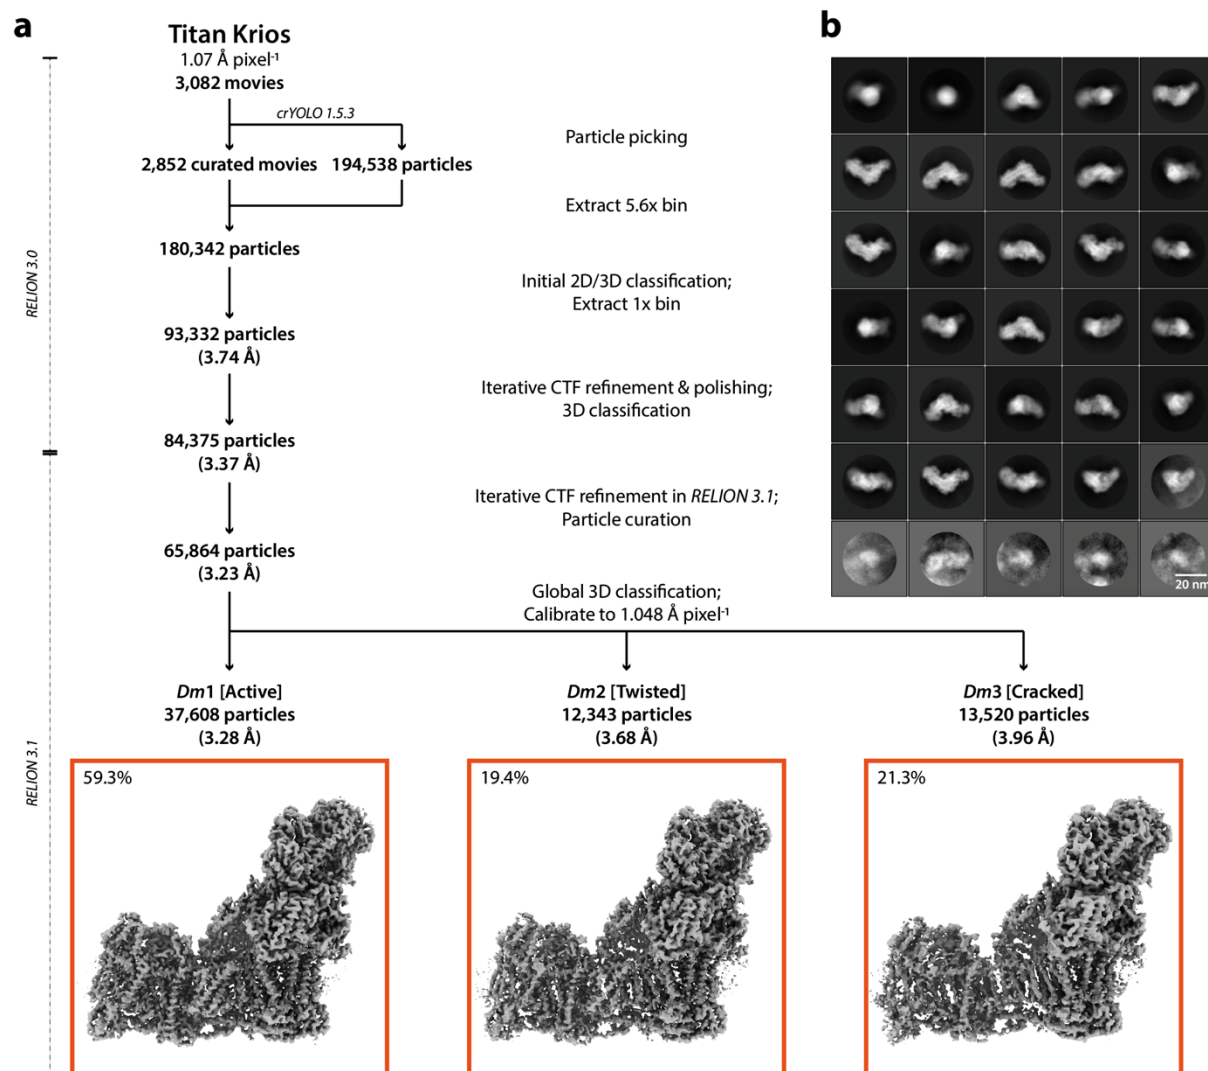

1180

1181

1182 **Cryo-EM data processing and particle classification.** a) A flow chart of cryo-EM data  
1183 processing leading to three distinct classes. Red boxes denote the final map for each class,  
1184 and the percentages of the total particle number in each class are indicated. The maps were  
1185 calibrated to a pixel size of 1.048 Å pixel<sup>-1</sup> during the postprocessing procedure (see Methods)  
1186 b) Representative 2D class averages. The example view was selected following 2D  
1187 classification of the final 3D refined particles to show classes of particles in different  
1188 orientations.

1189

1190 **Figure 1 – Figure Supplement 3**

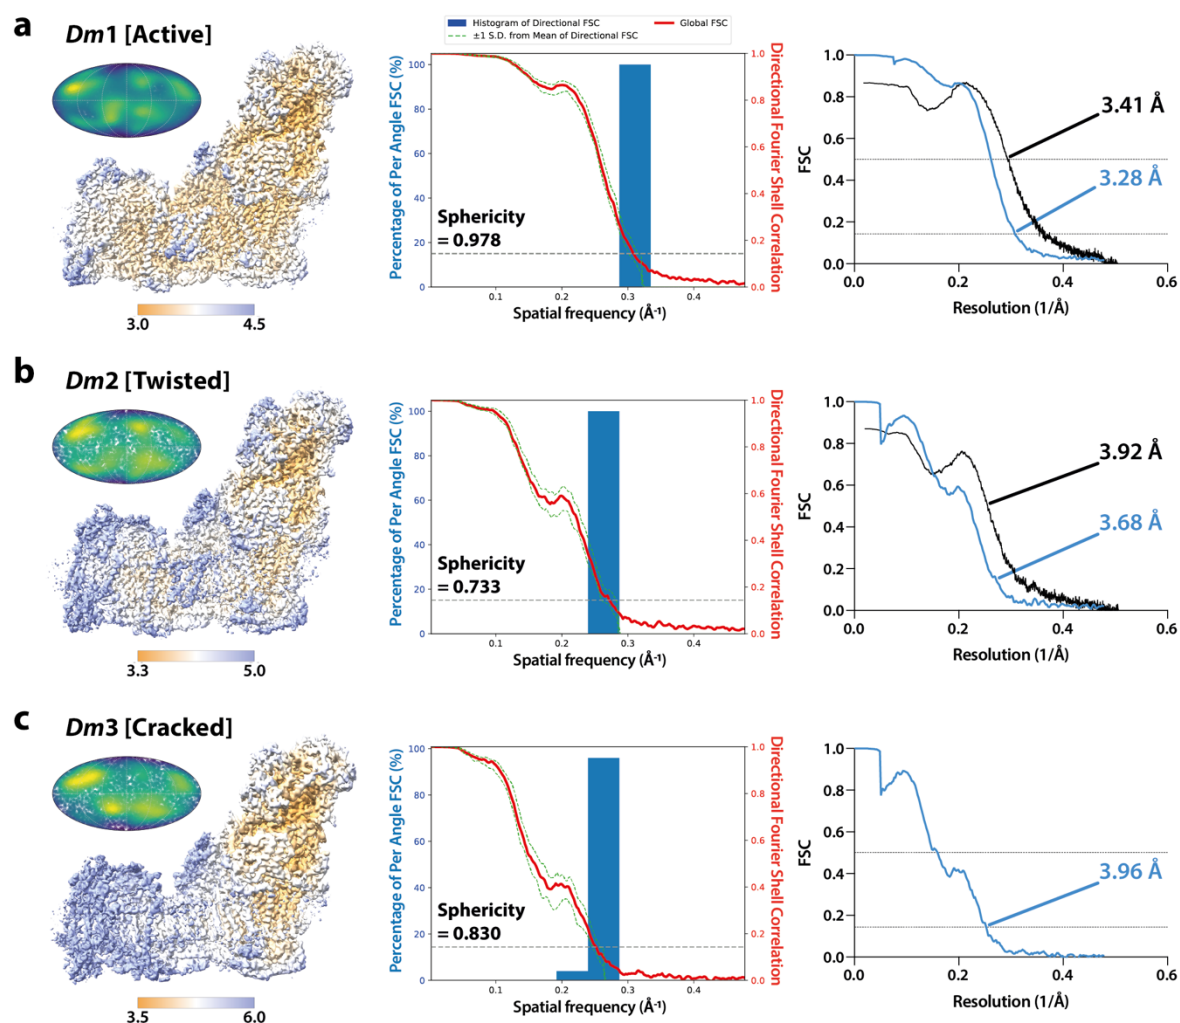

1191

1192

1193 **Local resolution maps, Mollweide projections, 3DFSC plots, and Fourier shell**

1194 **correlation curves for three states of *Drosophila* complex I.** Local resolution consensus

1195 maps (left), Mollweide projections (left inset), histogram and directional FSC (3DFSC) plots

1196 (middle), and Fourier shell correlation (FSC) curves (right) are shown for the (a) *Dm1* (active),

1197 (b) *Dm2* (twisted), and (c) *Dm3* (cracked) states of *Drosophila* complex I. Local resolutions

1198 were estimated using the *Local resolution* function in *RELION-3.1* (Zivanov et al., 2018) and

1199 plotted using *UCSF ChimeraX* (Pettersen et al., 2021) with map thresholds of 0.013, 0.014,

1200 and 0.015, respectively. Coloured keys indicate resolution in Å. Mollweide projections were

1201 plotted using *Python* and *Matplotlib*, and the degree of directional resolution anisotropy

1202 calculated using the *3DFSC* program suite (Tan et al., 2017). *RELION* half-map (sky blue)

1203 and model-map (black) FSC curves are shown.

1204

1205 **Figure 1 – Figure Supplement 4**

1206

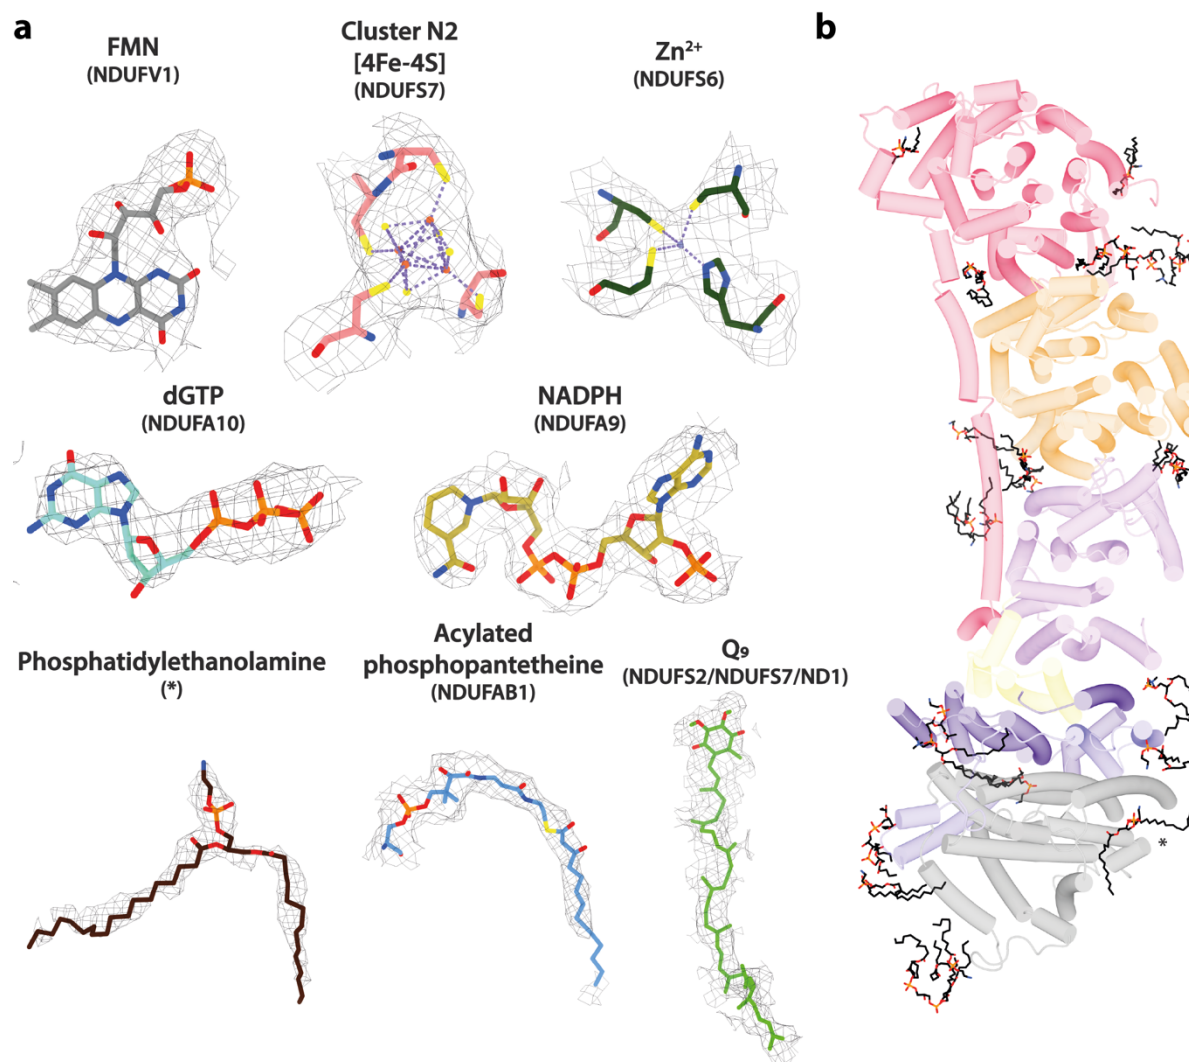

1207

1208 **Cryo-EM densities and models for ligands and phospholipids observed in *Drosophila***

1209 **complex I.** The densities and models shown are all from the *Dm1* active state structure. **a)**

1210 Cryo-EM densities of cofactors, ions, post-translational modifications, and phospholipids.

1211 Cryo-EM densities are shown at map thresholds of 0.006–0.013 in *UCSF ChimeraX*

1212 (Pettersen et al., 2021). **b)** A top-down view from the matrix of 23 phospholipid molecules

1213 (black) modelled in the *Dm1* structure. Asterisk (\*) indicates the phosphatidylethanolamine

1214 shown in panel **a**. Only core membrane subunits are shown and coloured as in Figure 1.

1215

1216 **Figure 1 – Figure Supplement 5**

1217

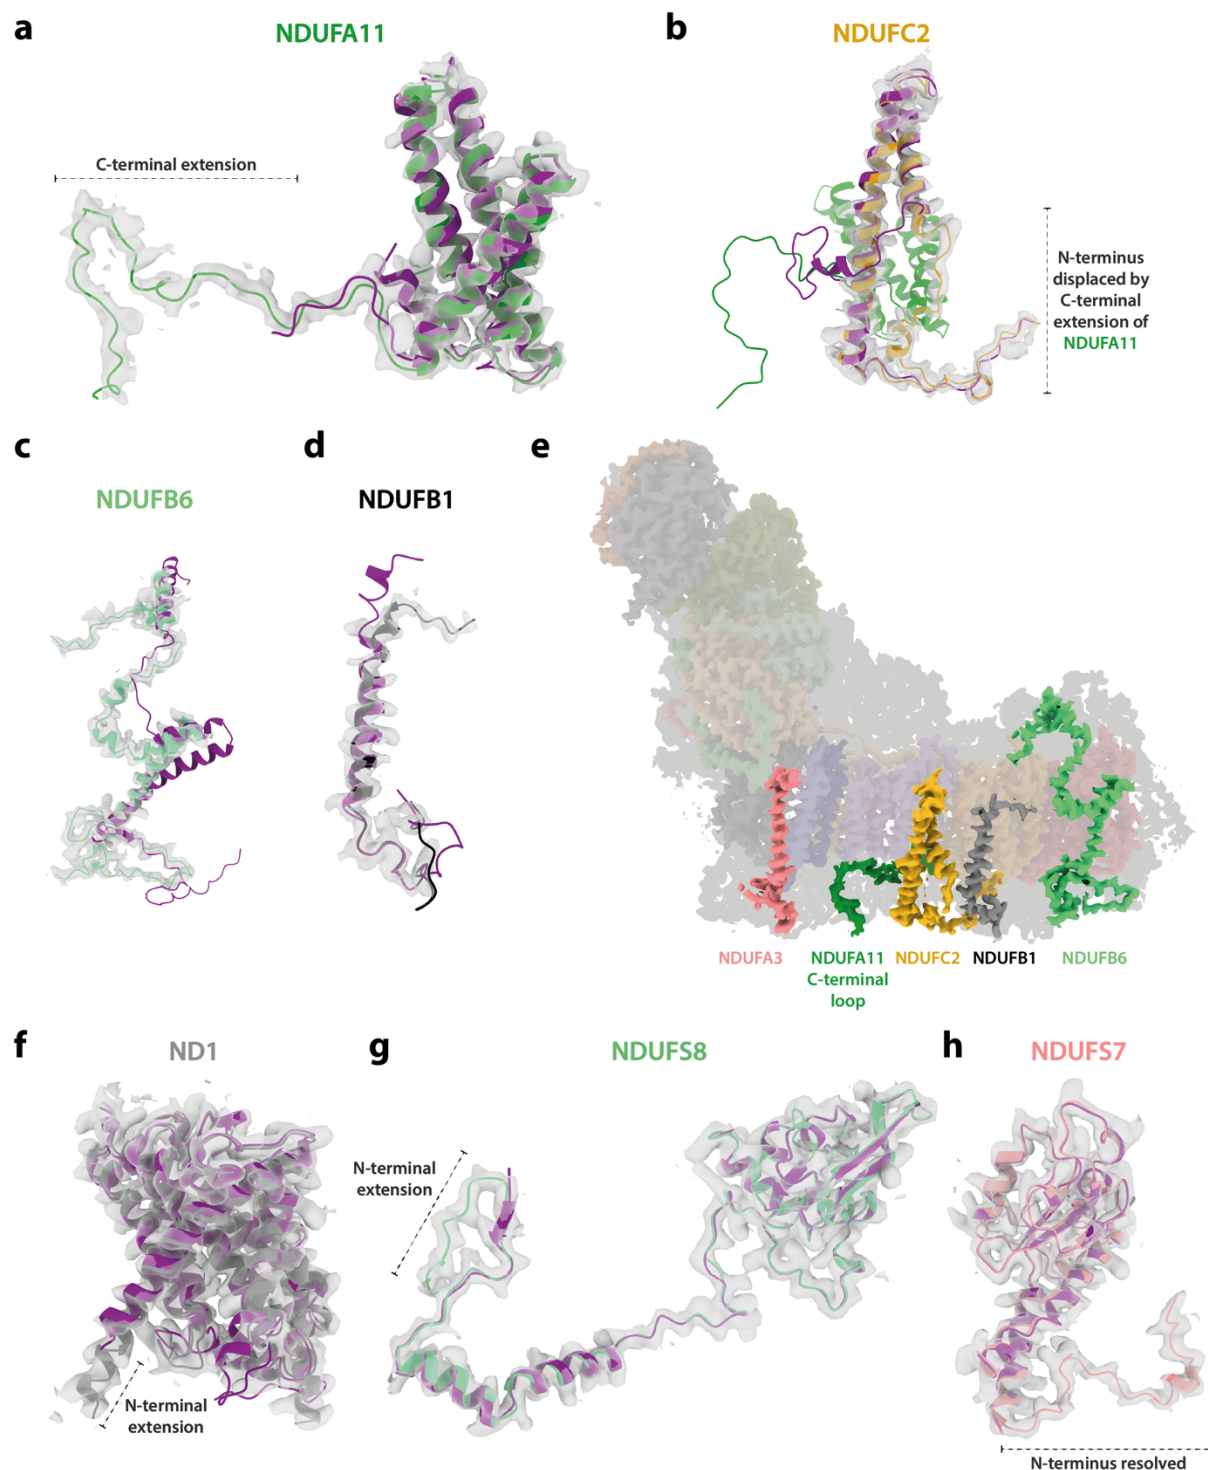

1218

1219

1220 **Cryo-EM densities and models for *Drosophila*-specific subunit extensions and**

1221 **conformations.** The densities and models shown are all from the *Dm1* active state structure.

1222 a) C-terminal extension of subunit NDUFA11 in comparison to the mammalian enzyme. b)

1223 The N-terminus of NDUFC2, at the interface between ND2 and NDUFB5 in the mammalian

1224 enzyme, is displaced by the extended C-terminal loop of NDUFA11. **c-d**) Conformational  
1225 differences between the active-state structures of mammalian and *Drosophila* complex I at  
1226 subunits **(c)** NDUFB6 and **(d)** NDUFB1. **e**) Subunits that differ substantially between the  
1227 mammalian and *Drosophila* complexes (panels **b-d** and subunit NDUFA3, see Figure 1  
1228 Supplement 6) are on the same side of the membrane domain of complex I. The 14 core  
1229 subunits are shown in transparent colour, and supernumerary subunits are in grey. **f-g**) N-  
1230 terminal extensions of subunits **(f)** ND1 and **(g)** NDUFS8 in *Drosophila* with respect to the  
1231 mammalian subunits. **h**) The conserved N-terminal loop of subunit NDUFS7 is well-resolved  
1232 and modelled for the first time. In all panels (except for **e**), the active-state bovine complex I  
1233 model (purple; PDB ID: 7QSK) (Chung et al., 2022b) is aligned to the respective *Dm1* active-  
1234 state *Drosophila* subunit model (coloured). Cryo-EM densities of the *Drosophila* map are  
1235 shown at a map threshold of 0.013 in *UCSF ChimeraX* (Pettersen et al., 2021).  
1236

1237 **Figure 1 – Figure Supplement 6**

1238

**a**

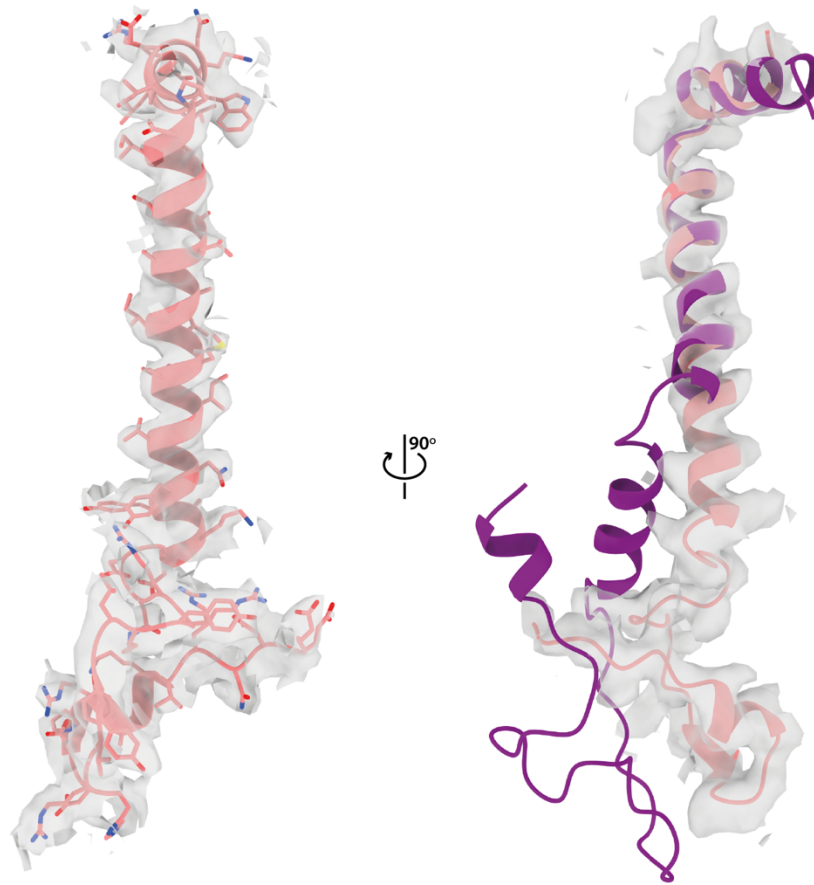

**b**

|                        |                                               |    |
|------------------------|-----------------------------------------------|----|
| <i>D. melanogaster</i> | MSASAARGSTSLKRAWNEIPDIVGGSALALAGIVMATIGVANY   | 45 |
| <i>H. sapiens</i>      | ---MAARVGAF LKNWDKEPVLVVSFVVGGLAVILPPLSPYFKY  | 41 |
| <i>B. taurus</i>       | ---MAGRISAF LKNWAKEPVLVVSFSVWGLAIIIMPISPYTKY  | 41 |
| <i>M. musculus</i>     | ---MAERVA AFLKNVWAKEPVLVASFAIAGLAVILPTLSPYTKY | 41 |

|                        |                                                  |    |
|------------------------|--------------------------------------------------|----|
| <i>D. melanogaster</i> | AKDGDNRRYKLG YVVYRHDDPRALKVRNDEDD                | 77 |
| <i>H. sapiens</i>      | SVM - INKATPYNY PVPVRDDGNMPDVP SHPQDPQGPSLEWLKKL | 84 |
| <i>B. taurus</i>       | ASM - INKATPYNY PVPVRDDGNMPDVP SHPQDPLGPSLDWLKNL | 84 |
| <i>M. musculus</i>     | SLM - INRATPYNY PVPLRDDGNMPDVP SHPQDPQGPSLEWLKRL | 84 |

1239

1240

1241

1242

1243

1244

1245

1246

1247

1248

1249

1250

**Cryo-EM density and model for subunit NDUF3 in *Drosophila* complex I.** The density and model are from the *Dm1* active state. **a)** Cryo-EM density of *Drosophila* NDUF3 in two orthogonal views at a map threshold of 0.013 in *UCSF ChimeraX* (Pettersen et al., 2021). Left, the structure of *Drosophila* NDUF3 (pink) with side chains shown. Right, the structure of mammalian NDUF3 (purple; PDB ID: 7QSK) (Chung et al., 2022b) aligned to the *Drosophila* subunit. **b)** Sequence alignment of the *Drosophila* NDUF3 subunit with a selection of mammalian species. Residues are coloured by similarity. UniProt IDs used for multiple sequence alignment in *Clustal Omega 1.2.4* (Sievers et al., 2011): *Drosophila melanogaster*, Q9W380 (Dmel gene CG9034), *Homo sapiens*, O95167, *Bos taurus*, Q02371, *Mus musculus*, Q9CQ91.



1251 **Figure 2 – Figure Supplement 1**

1252

1253

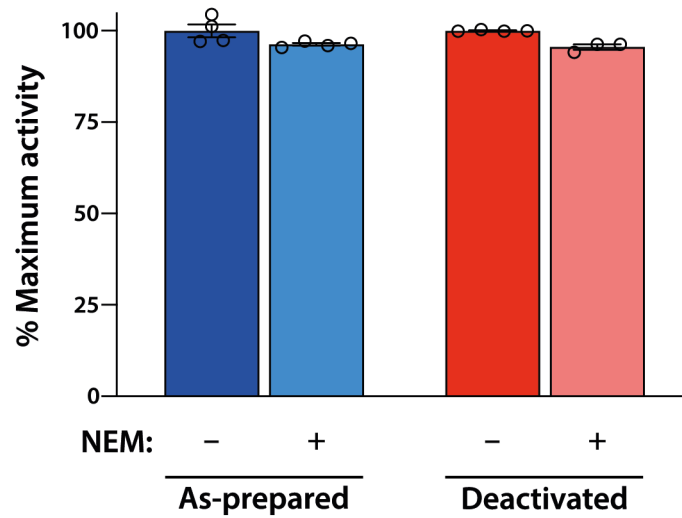

1254

1255

1256 **The NEM assay does not reveal a mammalian-type deactive state for *Drosophila***  
1257 **complex I.** Samples of 'as-prepared' (blue) or 'deactivated' (red) *Drosophila* mitochondria  
1258 were treated with NEM to determine the sensitivity of the rate of catalysis (see Methods for  
1259 details). The rates observed did not change materially following NEM treatment, indicating  
1260 that a mammalian-type deactive state is not present, even following a deactivation treatment  
1261 (incubation at 37 °C for 30 min.). All measurements are normalised to the maximum NADH:O<sub>2</sub>  
1262 rate for each set (as-prepared = 0.16 μmol min<sup>-1</sup> mg<sup>-1</sup>, deactivated = 0.14 μmol min<sup>-1</sup> mg<sup>-1</sup>)  
1263 and shown as mean averages with error (± S.E.M.) values from three or four technical  
1264 replicates.

1265

1266 **Figure 2 – Figure Supplement 2**

1267

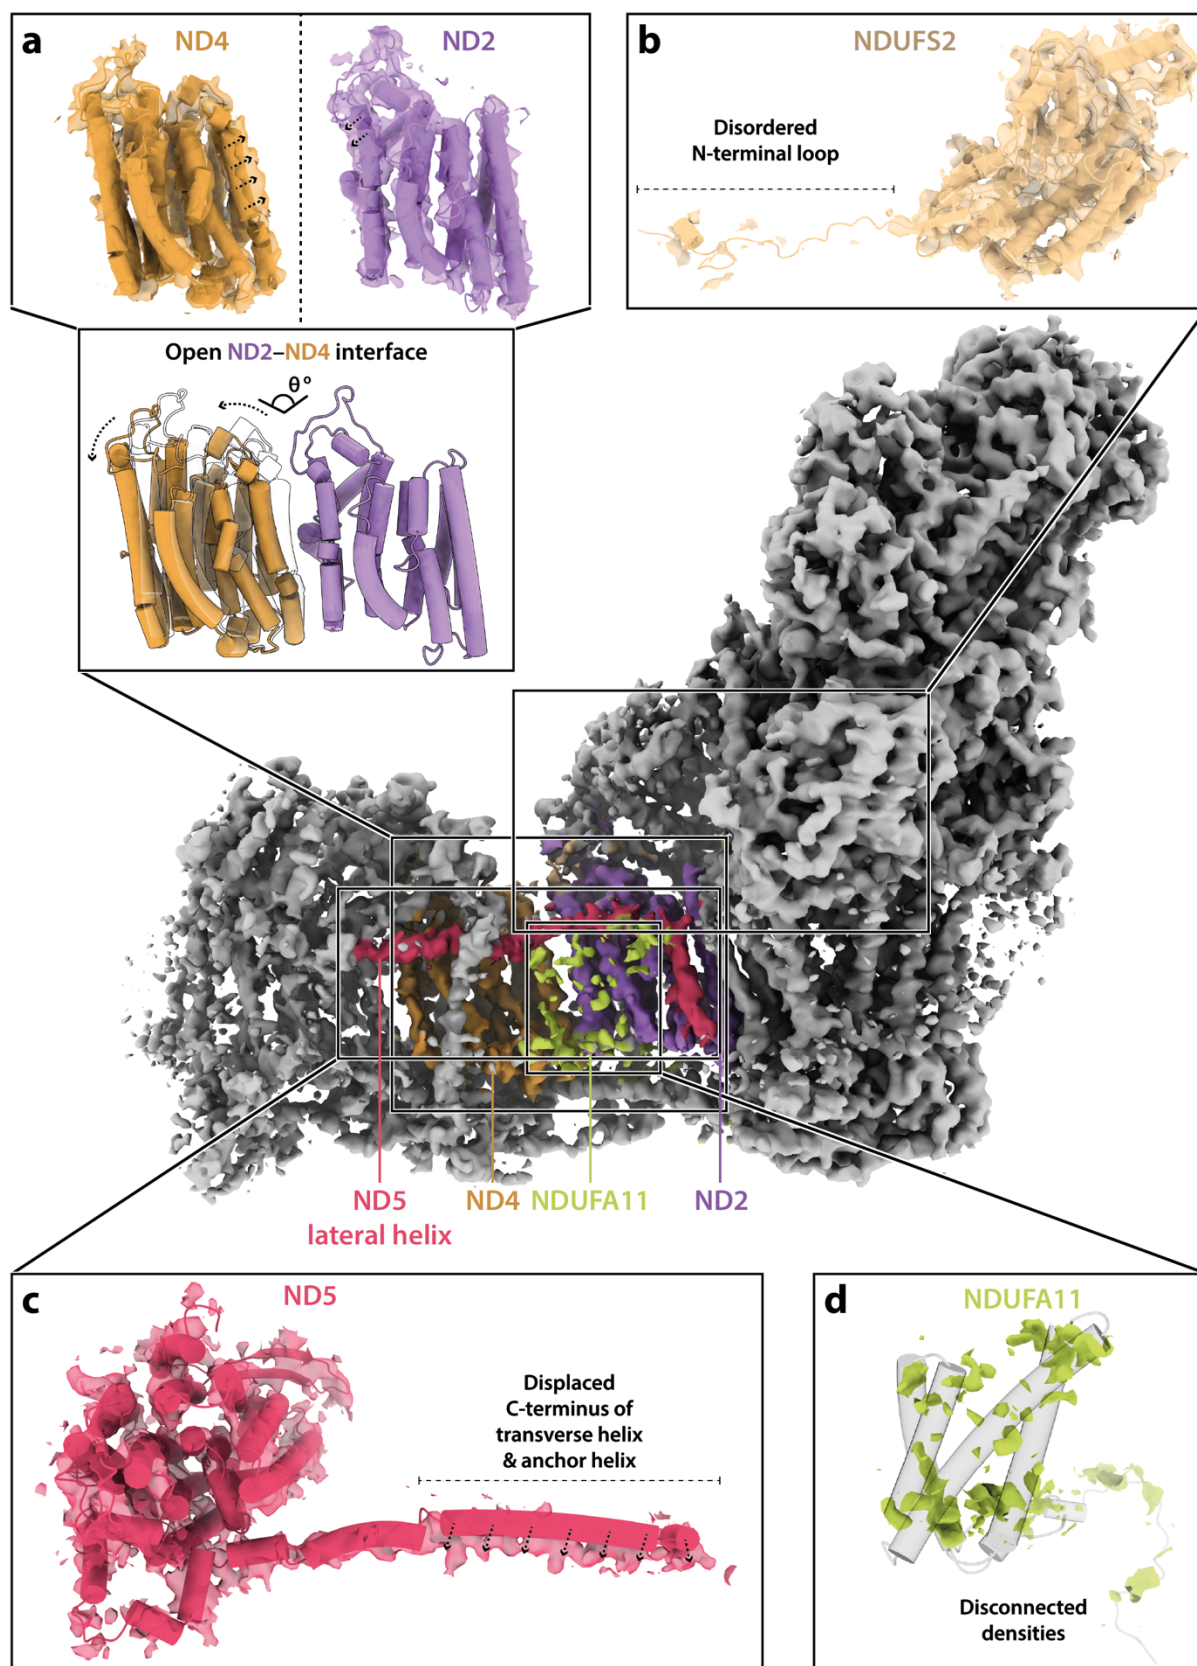

1268

1269 **Structural features of the *Dm3* state of *Drosophila* complex I.** In all panels *Dm2* subunit  
1270 models are shown rigid-body fitted into the *Dm3* cryo-EM map. **a)** The ND2 and ND4 subunits  
1271 rotate against each other and move apart in the *Dm3* state. In the top panels the arrows  
1272 indicate the inward collapse of the interface helices, and in the bottom panel the white  
1273 transparent structure shows the ND2 subunit in the *Dm2* state (with the structures aligned to  
1274 ND4) to show the extent of the movement. **b)** The N-terminal loop of NDUFS2, which is  
1275 ordered in the *Dm1* and *Dm2* states, is disordered in the *Dm3* structure. **c)** As the ND2–ND4  
1276 interface opens, the C-terminal section of the ND5 transverse helix and the anchor TMH are  
1277 displaced. **d)** The density for subunit NDUFA11 in the *Dm3* state is disordered and  
1278 fragmented. Cryo-EM densities are shown at map thresholds of 0.013–0.015 in *UCSF*  
1279 *ChimeraX* (Pettersen et al., 2021).  
1280

1281 **Figure 3 – Figure Supplement 1**

1282

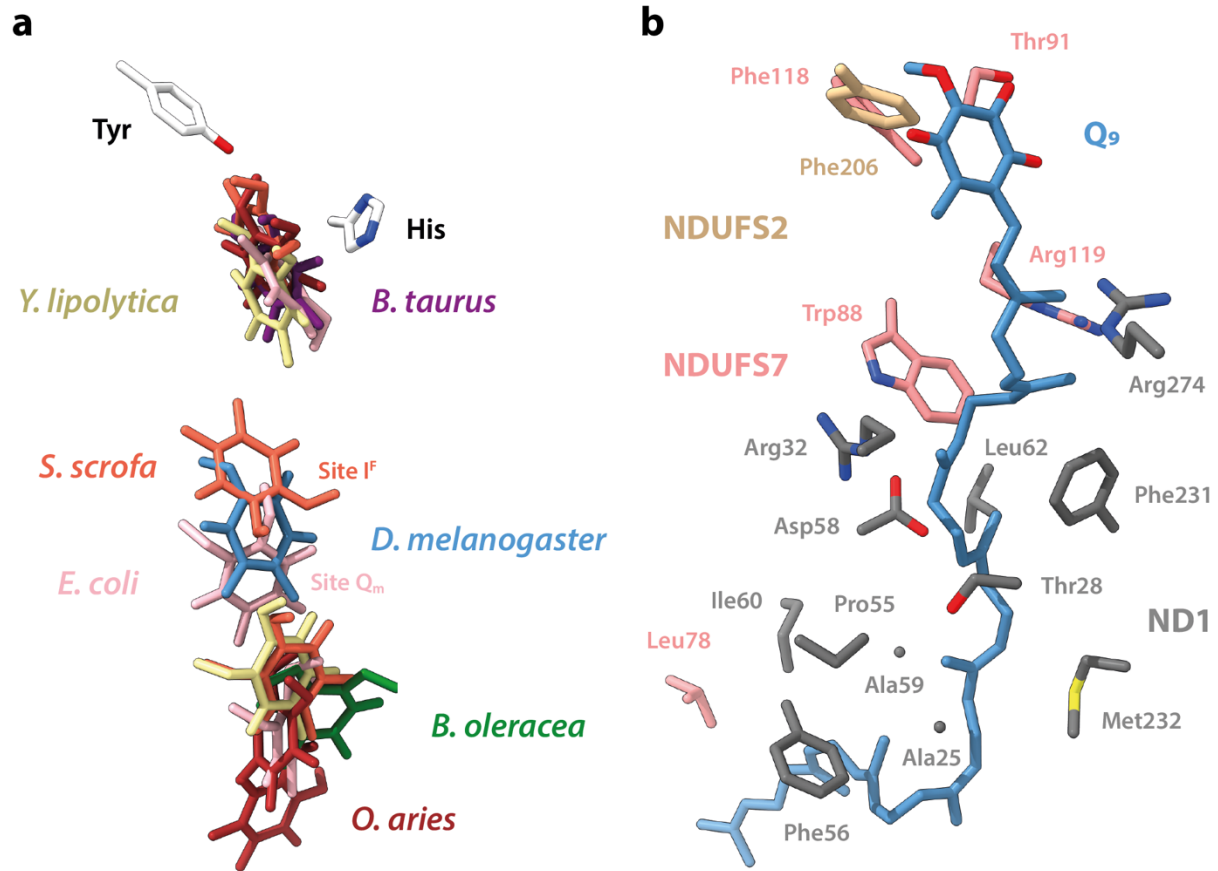

1283

1284

1285 **Comparison of the position of the bound ubiquinone in the *Dm1* state with the positions**

1286 **of ubiquinone molecules bound in other structures. a) Ubiquinone headgroups from Q<sub>10</sub>,**

1287 **Q<sub>9</sub>, Q<sub>1</sub>, and dQ bound in cryo-EM structures of complex I. Q<sub>9</sub> bound in *Dm1* is shown in blue.**

1288 **Models are overlaid on subunit NDUF52. Positions of Tyr and His are from the bovine active-**

1289 **state model. PDB IDs: 7QSK (Chung et al., 2022b) (*Bos taurus*, purple), 6ZKC and 6ZKD**

1290 **(Kampjut and Sazanov, 2020) (*Ovis aries*, red), 7V2R (Gu et al., 2022) (*Sus scrofa*, orange),**

1291 **7A23 (Soufari et al., 2020) (*Brassica oleracea var. botrytis*, green), 6RFR (Parey et al., 2019)**

1292 **and 7O6Y (Parey et al., 2021) (*Yarrowia lipolytica*, beige), and 7Z7S and 7P64 (Kravchuk et**

1293 **al., 2022) (*Escherichia coli*, light pink). b) The environment of the bound Q<sub>9</sub> in the *Dm1***

1294 **structure, showing residues within 4 Å of the substrate.**

1295

1296 **Figure 5 – Figure Supplement 1**

1297

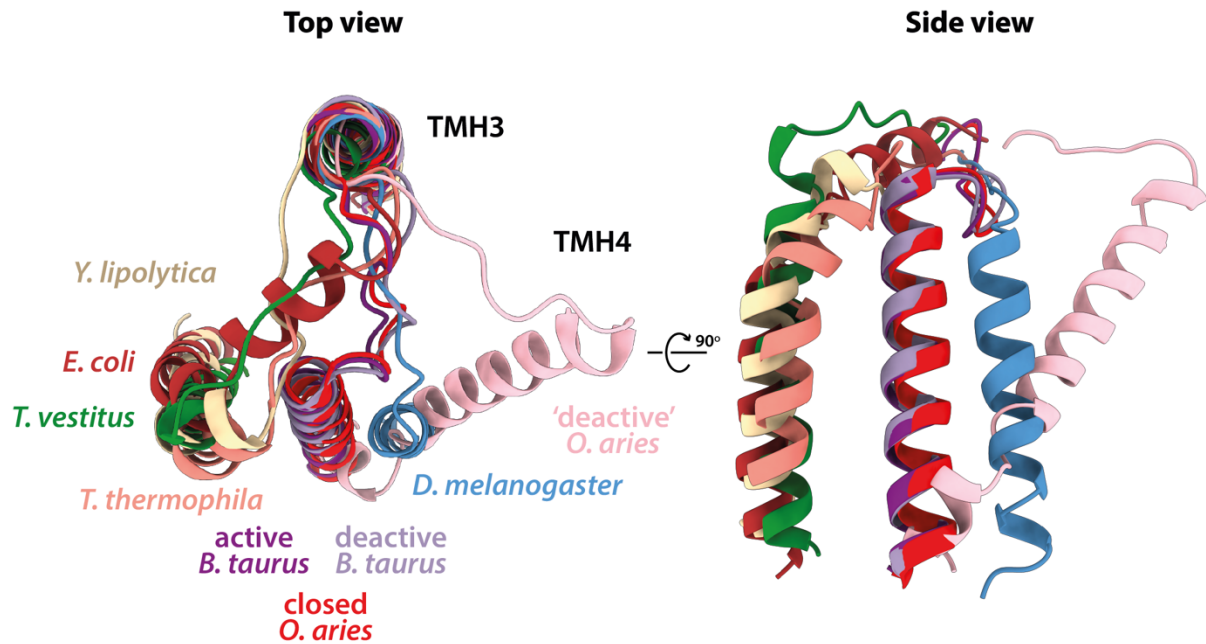

1298

1299

1300 **Comparison of the position of ND6-TMH4 in the *Dm1* state with the positions of ND6-**

1301 **TMH4 in other structures.** Truncated ND6 models of *Drosophila melanogaster* (*Dm1*, blue),

1302 *Bos taurus* (PDB ID: 7QSK, active state, purple; 7QSM, deactive state, light purple (Chung et

1303 al., 2022b)), *Ovis aries* (PDB ID: 6ZKO, closed state, red; 6ZKS, open1 state of the 'deactive'

1304 dataset, light pink (Kampjut and Sazanov, 2020)), *Yarrowia lipolytica* (PDB ID: 6YJ4, beige

1305 (Grba and Hirst, 2020)), *Tetrahymena thermophila* (PDB ID: 7TGH, orange (Zhou et al.,

1306 2022)), *Thermosynechococcus vestitus* (PDB ID: 6HUM, green (Schuller et al., 2019)), and

1307 *Escherichia coli* (PDB ID: 7Z7S, closed, brick red (Kravchuk et al., 2022)), showing TMH3 and

1308 TMH4 only (left) and TMH4 only (right). All models are aligned to the *Drosophila* ND6 subunit.

1309

1310 **Figure 6 – Figure Supplement 1**

1311

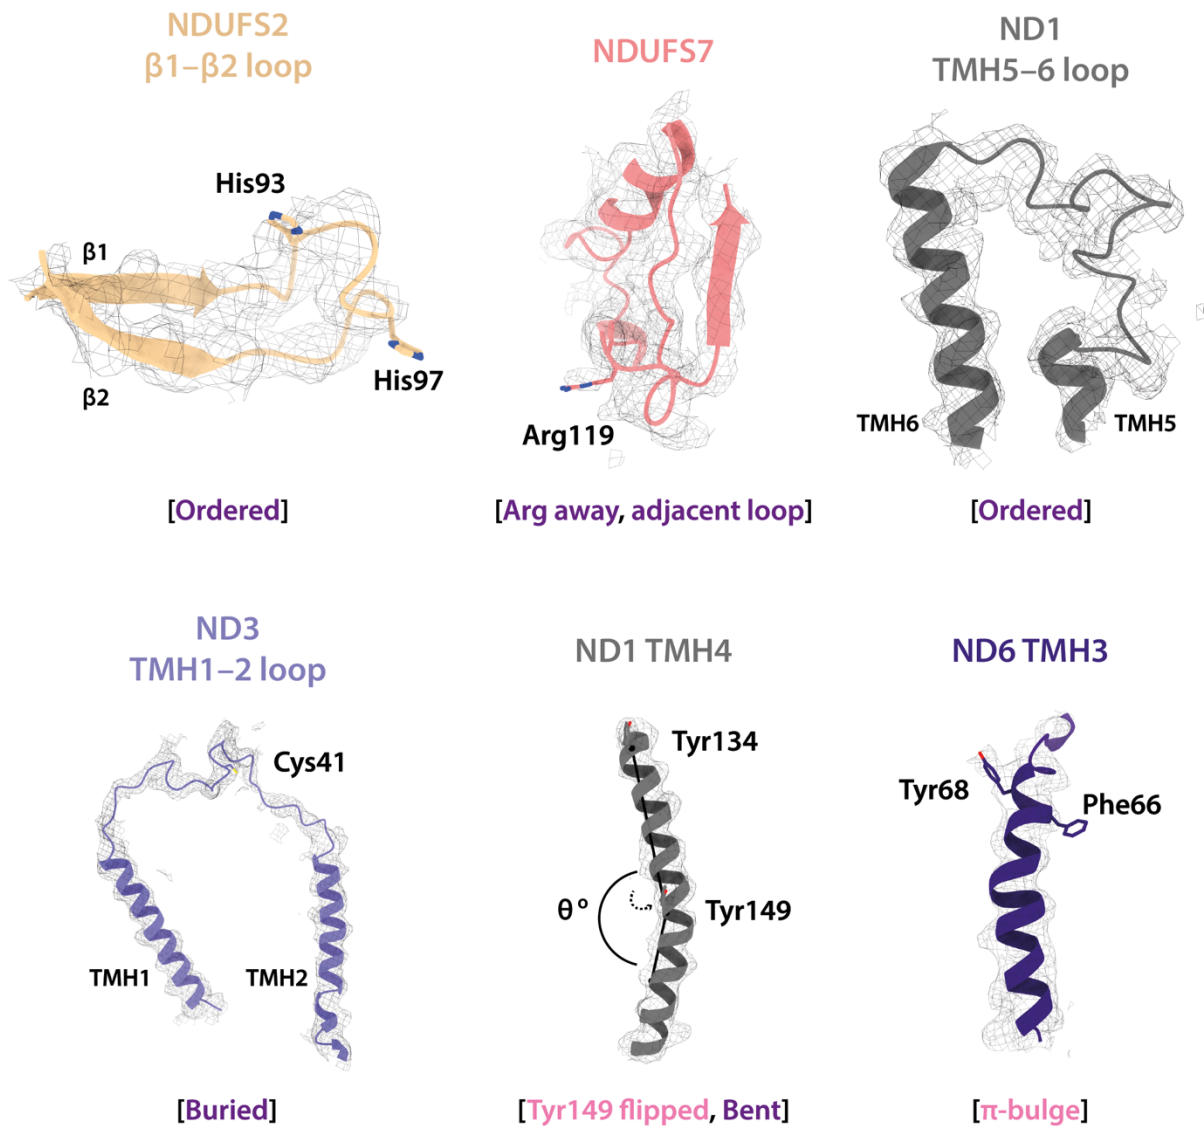

1312

1313

1314 **Local structural elements in the *Dm2* state are conserved in *Dm3*.** The local elements in the  
 1315 core subunits that indicate the active/deactive status of the *Dm3* complex are highlighted and  
 1316 labelled, compared against the respective cryo-EM densities. Only two deactive features are  
 1317 observed (Tyr149-ND1 and ND6-TMH3). Subunit models shown are the *Dm2* model rigid-  
 1318 body fitted into the *Dm3* cryo-EM map. Active (purple) and deactive (light pink) state-specific  
 1319 key local features are indicated in square brackets. Cryo-EM densities are shown at map  
 1320 thresholds of 0.013–0.015 in *UCSF ChimeraX* (Pettersen et al., 2021).

1321
